# Supplementary material for: A novel family of AIE-active meso-2-ketopyrrolyl BODIPYs: bright solid-state red fluorescence, morphological properties and application as viscosimeters in live cells
Source: Royal Society of Chemistry journal article supplement (doi:10.1039/c9qm00154a), 2019-01-01
Supplement: c9qm00154a1.pdf [file c9qm00154a1.pdf]

*Electronic Supplementary Information*

**A novel family of AIE-active *meso*-2-ketopyrrolylBODIPYs:  
Bright solid-state red fluorescence, morphological properties and  
application as viscosimeters in live cells**

Changjiang Yu,<sup>†acd</sup> Zhenlong Huang,<sup>†b</sup> Wei Gu,<sup>a</sup> Qinghua Wu,<sup>a</sup> Erhong Hao,<sup>\*a</sup> Yi Xiao,<sup>\*b</sup>  
Lijuan Jiao<sup>\*a</sup> and Wai-Yeung Wong<sup>\*c</sup>

<sup>a</sup> The Key Laboratory of Functional Molecular Solids, Ministry of Education; School of Chemistry and Materials Science, Anhui Normal University, Wuhu 241000, China.

<sup>b</sup> State Key Laboratory of Fine Chemicals, Dalian University of Technology, 2 Linggong Road, Dalian 116024, China.

<sup>c</sup> Department of Applied Biology and Chemical Technology, The Hong Kong Polytechnic University, Hung Hom, Hong Kong, China.

<sup>d</sup> State Key Laboratory of Coordination Chemistry, Nanjing University, Nanjing 210093, China.

<sup>†</sup> equal contribution

\*To whom correspondence should be addressed. E-mail: [haoehong@ahnu.edu.cn](mailto:haoehong@ahnu.edu.cn); [xiaoyi@dlut.edu.cn](mailto:xiaoyi@dlut.edu.cn); [jiao421@ahnu.edu.cn](mailto:jiao421@ahnu.edu.cn); [wai-yeung.wong@polyu.edu.hk](mailto:wai-yeung.wong@polyu.edu.hk)

**Contents:**

|                                                               |     |
|---------------------------------------------------------------|-----|
| 1. Crystal packings and selected parameters.....              | S2  |
| 2. Photophysical properties.....                              | S7  |
| 3. Aggregation-induced emission properties.....               | S14 |
| 4. SEM and TEM images.....                                    | S18 |
| 5. Dynamic light scattering.....                              | S19 |
| 6. Viscosity sensitivity studies.....                         | S21 |
| 7. Cell culture.....                                          | S24 |
| 8. MTT Assay.....                                             | S27 |
| 9. Viscosity determination in real-time during apoptosis..... | S28 |
| 10. NMR for <i>meso</i> -2-ketopyrrolyl BODIPYs.....          | S29 |
| 11. HRMS for <i>meso</i> -2-ketopyrrolyl BODIPYs.....         | S33 |
| 12. DFT calculations.....                                     | S35 |

## 1. Crystal diagrams and selected data

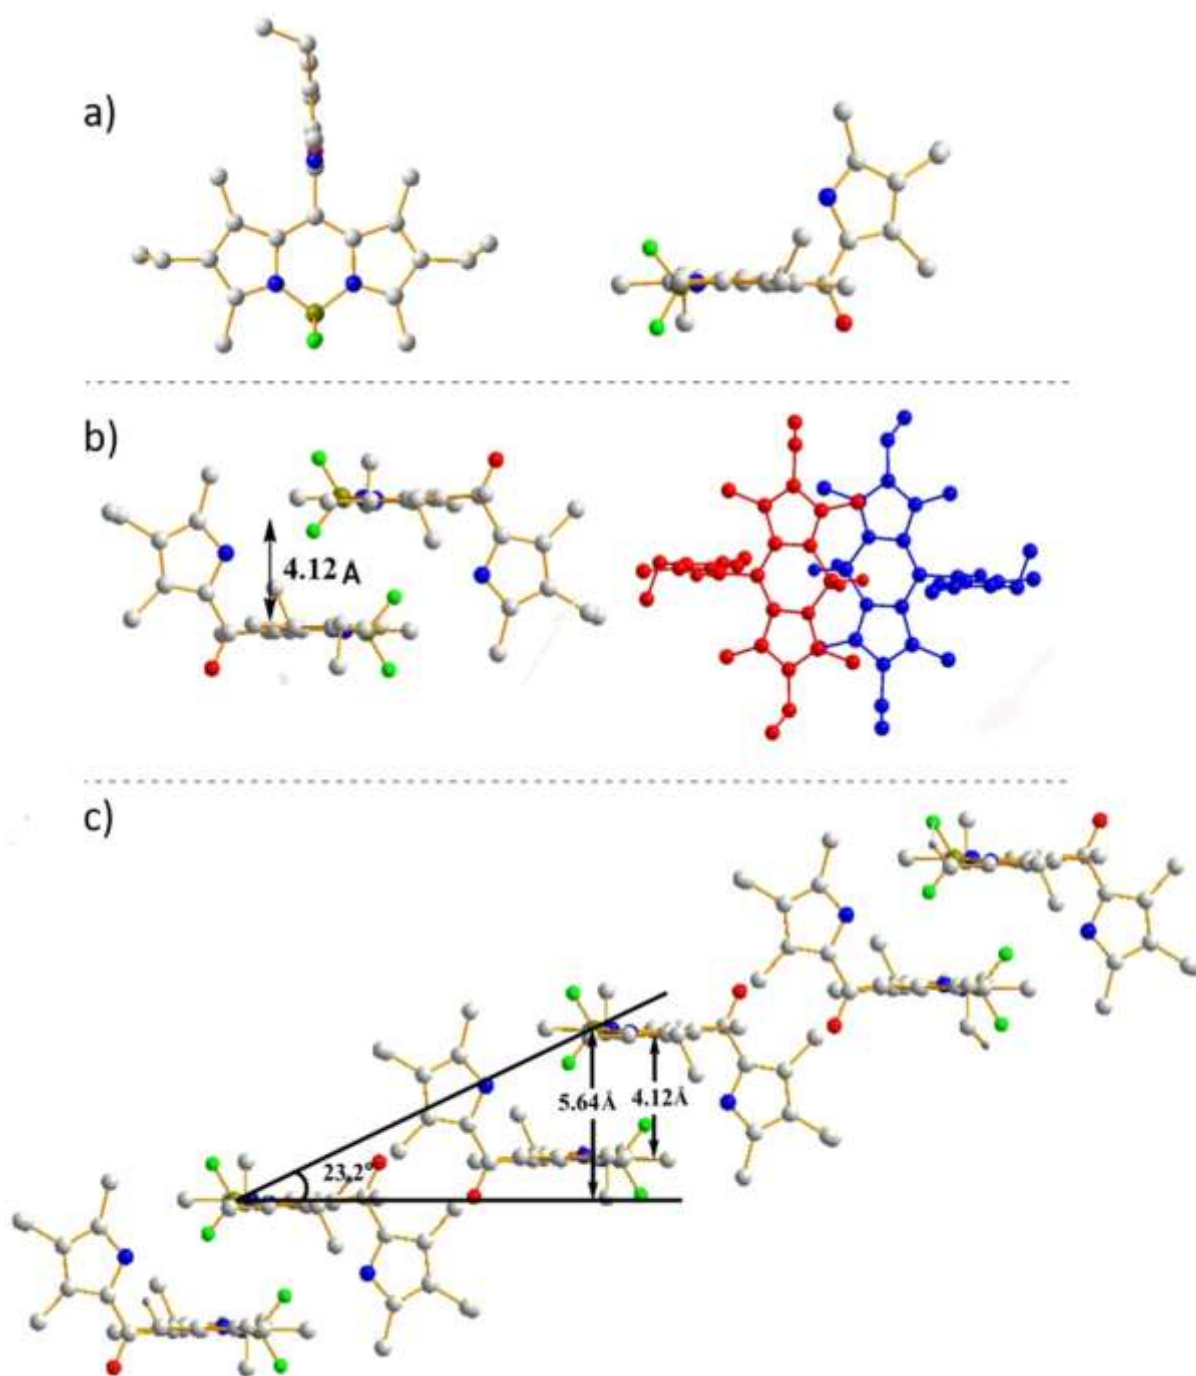

**Figure S1.** Crystal-packing pattern of **1a** between the adjacent interlayered crystals from side view. Interlayer distance is  $4.12 \text{ \AA}$  and tilt angle is  $23.2^\circ$  for coplanar inclined arrangements of its transition dipole. C, light gray; N, blue; B, dark yellow; F, green; O, red; H atoms are omitted for clarity.

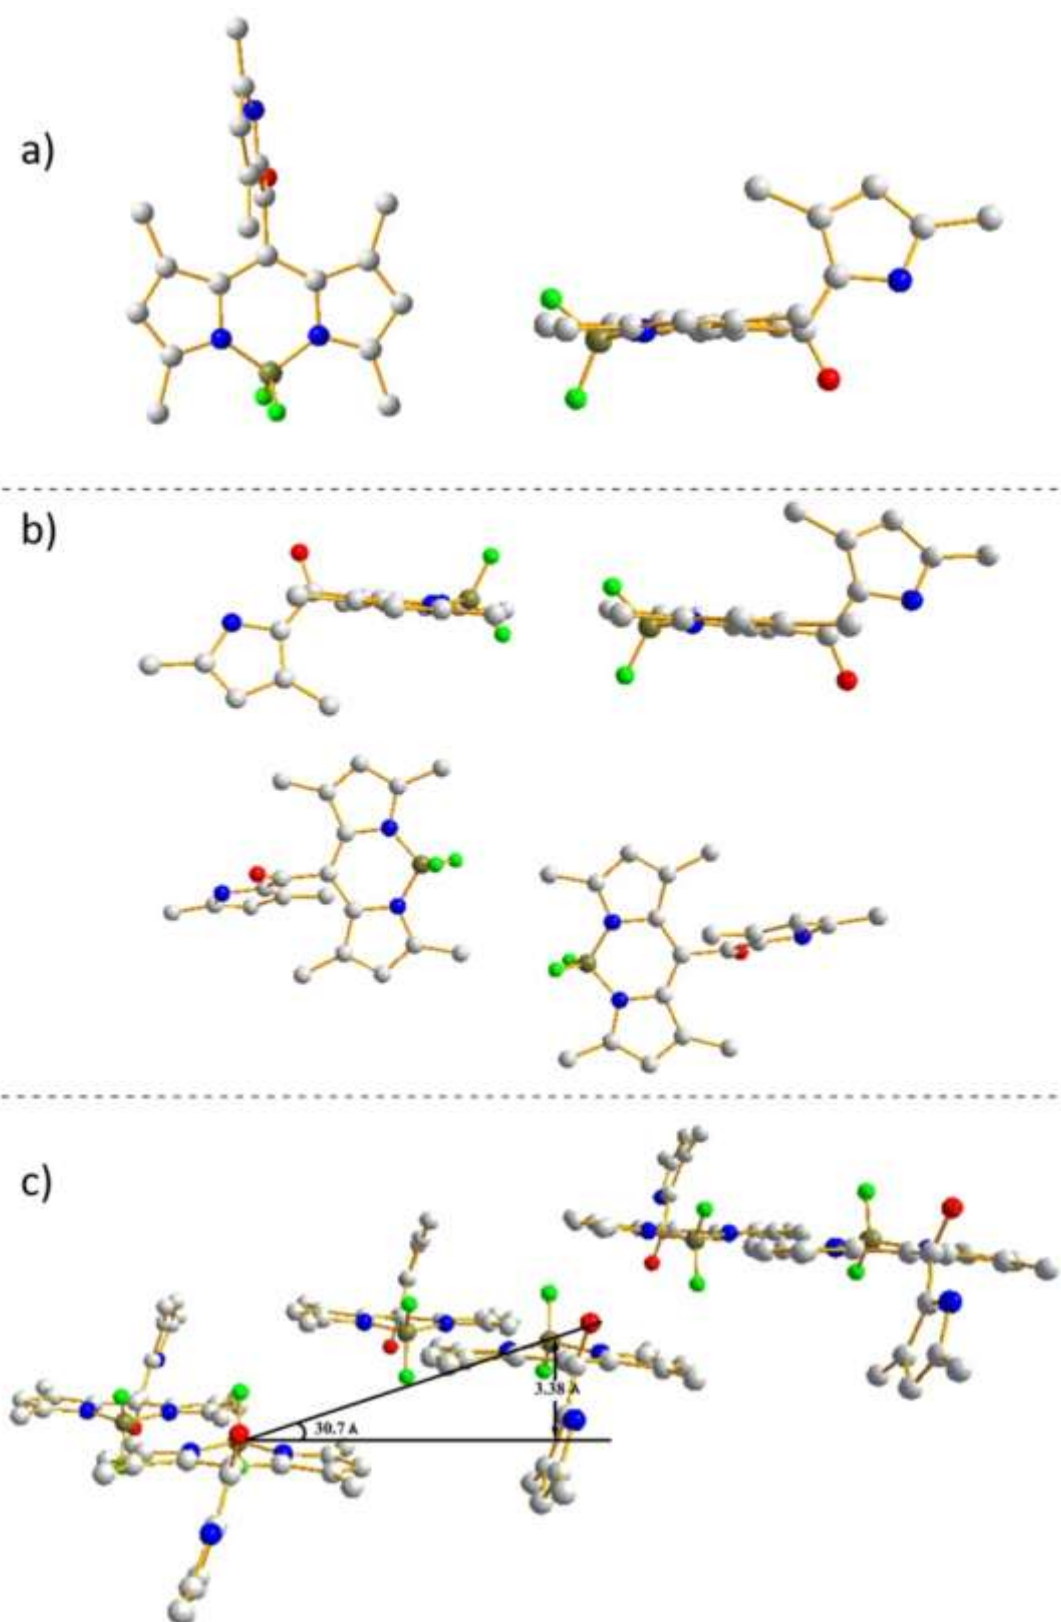

**Figure S2.** Crystal-packing pattern of **1b** between the adjacent interlayered crystals from side view. Interlayer distance is 3.38 Å and tilt angle is 30.7° for coplanar inclined arrangements of its transition dipole. C, light gray; N, blue; B, dark yellow; F, green; O, red; H atoms are omitted for clarity.

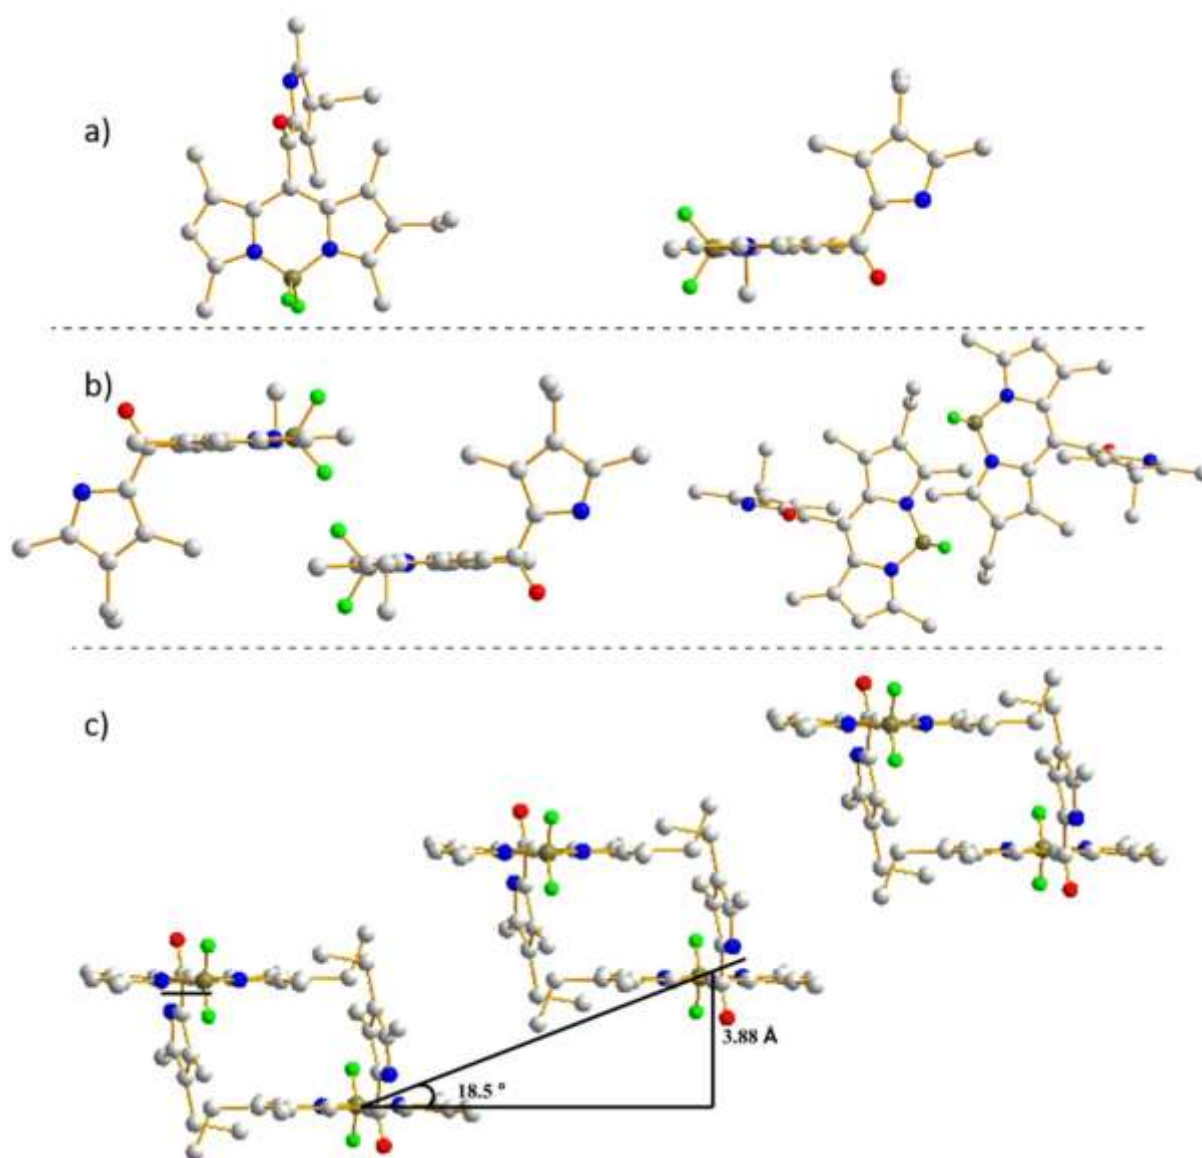

**Figure S3.** Crystal-packing pattern of **1c** between the adjacent interlayered crystals from side view. Interlayer distance is 3.88 Å and tilt angle is 18.5° for coplanar inclined arrangements of its transition dipole. C, light gray; N, blue; B, dark yellow; F, green; O, red; H atoms are omitted for clarity.

**Table S1.** Selected bond lengths [ $\text{\AA}$ ] and dihedral angles [deg] of *meso*-2-ketopyrrolyl-BODIPYs **1a-c** obtained from X-ray crystallography.

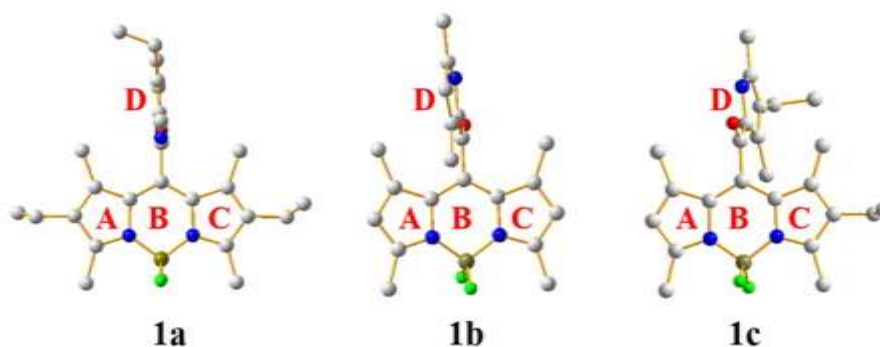

|                                                                                                         | <b>1a</b>                     | <b>1b</b>                     | <b>1c</b>                     |
|---------------------------------------------------------------------------------------------------------|-------------------------------|-------------------------------|-------------------------------|
| the B-F bond distances ( $\text{\AA}$ )                                                                 | 1.390<br>1.392                | 1.377<br>1.383                | 1.381<br>1.389                |
| the B-N bond distances ( $\text{\AA}$ )                                                                 | 1.536<br>1.536                | 1.549<br>1.550                | 1.533<br>1.547                |
| dihedral angles of two coordinated pyrrolic rings <b>A</b> and <b>C</b> (deg)                           | 5.0(2)                        | 8.78(2)                       | 1.51(1)                       |
| dihedral angles between the six-membered ring <b>B</b> composed of NBN and the BODIPY core (deg)        | 0.53(1)                       | 0.61(2)                       | 0.40(2)                       |
| dihedral angles between the <i>meso</i> -uncoordinated pyrrolic ring <b>D</b> and the BODIPY core (deg) | 88.8(2)                       | 72.9(1)                       | 81.4(1)                       |
| intramolecular C-H $\cdots$ F hydrogen bond distances ( $\text{\AA}$ )                                  | 2.602, 2.611,<br>2.680, 2.759 | 2.542, 2.728,<br>2.726, 2.878 | 2.571, 2.600,<br>2.707, 2.772 |
| intermolecular C-H $\cdots$ F hydrogen bond distances ( $\text{\AA}$ )                                  |                               | 2.695, 2.695,<br>2.827, 2.827 | 2.578,<br>2.612               |
| intermolecular N-H $\cdots$ F hydrogen bond distances ( $\text{\AA}$ )                                  | 2.075,<br>2.075               |                               |                               |

**Table S2.** Crystal data collection parameters for *meso*-2-ketopyrrolyl BODIPYs **1a**, **1b** and **1c** obtained from X-ray crystallography.

|                                                 | <b>1a</b>                                                        | <b>1b</b>                                                        | <b>1c</b>                                                        |
|-------------------------------------------------|------------------------------------------------------------------|------------------------------------------------------------------|------------------------------------------------------------------|
| CCDC no.                                        | 1541729                                                          | 1541728                                                          | 1901461                                                          |
| formula                                         | C <sub>26</sub> H <sub>34</sub> BF <sub>2</sub> N <sub>3</sub> O | C <sub>20</sub> H <sub>22</sub> BF <sub>2</sub> N <sub>3</sub> O | C <sub>24</sub> H <sub>30</sub> BF <sub>2</sub> N <sub>3</sub> O |
| M                                               | 453.37                                                           | 369.22                                                           | 425.32                                                           |
| T (K)                                           | 293(2)                                                           | 293(2)                                                           | 293(2)                                                           |
| $\lambda$ (Å)                                   | 0.71073                                                          | 0.71073                                                          | 0.71073                                                          |
| crystal system                                  | Monoclinic                                                       | Monoclinic                                                       | Monoclinic                                                       |
| space group                                     | C2/c                                                             | C2/c                                                             | C2/c                                                             |
| a (Å)                                           | 26.649(3)                                                        | 12.8894(18)                                                      | 23.744(3)                                                        |
| b (Å)                                           | 9.8463(10)                                                       | 9.0135(12)                                                       | 12.2488(12)                                                      |
| c (Å)                                           | 19.4482(19)                                                      | 31.806(4)                                                        | 19.0154(18)                                                      |
| $\alpha$ (deg)                                  | 90                                                               | 90                                                               | 90                                                               |
| $\beta$ (deg)                                   | 101.3930(10)                                                     | 93.146(2)                                                        | 101.276(2)                                                       |
| $\gamma$ (deg)                                  | 90                                                               | 90                                                               | 90                                                               |
| V (Å <sup>3</sup> )                             | 5002.5(9)                                                        | 3689.6(9)                                                        | 5423.7(10)                                                       |
| Z                                               | 8                                                                | 8                                                                | 8                                                                |
| D <sub>calcd</sub> (mg m <sup>-3</sup> )        | 1.204                                                            | 1.329                                                            | 1.042                                                            |
| $\mu$ mm <sup>-1</sup>                          | 0.083                                                            | 0.096                                                            | 0.073                                                            |
| F(000)                                          | 1936                                                             | 1552                                                             | 1808.0                                                           |
| $\theta$ range (deg)                            | 1.56 - 27.63                                                     | 2.76 - 27.62                                                     | 1.249 to 24.996                                                  |
| reflections collected/unique                    | 21129 / 5791                                                     | 15525 / 4277                                                     | 18895 / 4776                                                     |
| R (int)                                         | 0.0294                                                           | 0.0222                                                           | 0.0339                                                           |
| goodness-of-fit on F <sup>2</sup>               | 1.058                                                            | 1.047                                                            | 1.094                                                            |
| R1, wR2 [I > 2 $\sigma$ (I)]                    | 0.0637, 0.2012                                                   | 0.0458, 0.1300                                                   | 0.0544, 0.1846                                                   |
| R1, wR2 (all data)                              | 0.1044, 0.2386                                                   | 0.0618, 0.1441                                                   | 0.0718, 0.1948                                                   |
| Largest diff. peak and hole, e. Å <sup>-3</sup> | 0.306, -0.240                                                    | 0.277, -0.210                                                    | 0.21, -0.17                                                      |

## 2. Photophysical properties

**Table S3.** Photophysical properties of *meso*-2-ketopyrrolyl BODIPYs **1a** and **1b** in several organic solvents and powder state.

| dyes      | solvents        | $\lambda_{\text{abs}}^{\text{max}}$<br>(nm) | $\lambda_{\text{em}}^{\text{max}}$<br>(nm) | $\log \epsilon_{\text{max}}^{\text{a}}$ | $\phi^{\text{b}}$ | Stokes shift<br>( $\text{cm}^{-1}$ ) |
|-----------|-----------------|---------------------------------------------|--------------------------------------------|-----------------------------------------|-------------------|--------------------------------------|
| <b>1a</b> | cyclohexane     | 532                                         | 557                                        | 4.89                                    | 0.12              | 844                                  |
|           | toluene         | 534                                         | 561                                        | 4.84                                    | 0.19              | 901                                  |
|           | dichloromethane | 534                                         | 560                                        | 4.81                                    | 0.21              | 869                                  |
|           | tetrahydrofuran | 530                                         | 554                                        | 4.84                                    | 0.18              | 817                                  |
|           | acetonitrile    | 529                                         | 555                                        | 4.79                                    | 0.10              | 886                                  |
|           | methanol        | 530                                         | 549                                        | 4.80                                    | 0.13              | 653                                  |
|           | glycerol        | 534                                         | 554                                        | 4.82                                    | 0.43              | 676                                  |
|           | solid state     | -                                           | 661                                        | -                                       | 0.13              | -                                    |
| <b>1b</b> | cyclohexane     | 508                                         | 534                                        | 4.91                                    | 0.12              | 958                                  |
|           | toluene         | 510                                         | 537                                        | 4.91                                    | 0.07              | 986                                  |
|           | dichloromethane | 509                                         | 533                                        | 4.90                                    | 0.08              | 885                                  |
|           | tetrahydrofuran | 507                                         | 530                                        | 4.93                                    | 0.05              | 856                                  |
|           | acetonitrile    | 504                                         | 526                                        | 4.88                                    | 0.03              | 830                                  |
|           | methanol        | 506                                         | 522                                        | 4.86                                    | 0.06              | 606                                  |
|           | glycerol        | 510                                         | 526                                        | 4.89                                    | 0.15              | 596                                  |
|           | solid state     | -                                           | 620                                        | -                                       | 0.21              | -                                    |
| <b>1c</b> | cyclohexane     | 520                                         | 548                                        | 4.88                                    | 0.03              | 983                                  |
|           | toluene         | 522                                         | 549                                        | 4.86                                    | 0.08              | 942                                  |
|           | dichloromethane | 521                                         | 548                                        | 4.83                                    | 0.10              | 946                                  |
|           | tetrahydrofuran | 518                                         | 544                                        | 4.80                                    | 0.03              | 923                                  |
|           | acetonitrile    | 517                                         | 543                                        | 4.78                                    | 0.01              | 926                                  |
|           | solid state     | -                                           | 653                                        | -                                       | 0.25              | -                                    |
| <b>1d</b> | cyclohexane     | 519                                         | 547                                        | 4.87                                    | 0.03              | 986                                  |
|           | toluene         | 522                                         | 549                                        | 4.84                                    | 0.08              | 942                                  |
|           | dichloromethane | 521                                         | 548                                        | 4.80                                    | 0.10              | 946                                  |
|           | tetrahydrofuran | 518                                         | 543                                        | 4.81                                    | 0.03              | 889                                  |
|           | acetonitrile    | 517                                         | 541                                        | 4.79                                    | 0.01              | 858                                  |
|           | solid state     | -                                           | 644                                        | -                                       | 0.22              | -                                    |

<sup>a</sup>Molar absorption coefficients of **1a-d** are calculated at the maximum of the highest peak in their absorption spectra. <sup>b</sup>Fluorescence quantum yields ( $\phi$ ) of **1a-d** were evaluated by using integrating sphere in the above solvents (excited at 480 nm for **1b-d** in the above solvents, excited at 500 nm for **1a**) and powder state (excited at 550 nm for **1a** and 500 nm for **1b-d**). The standard errors are less than 5%.

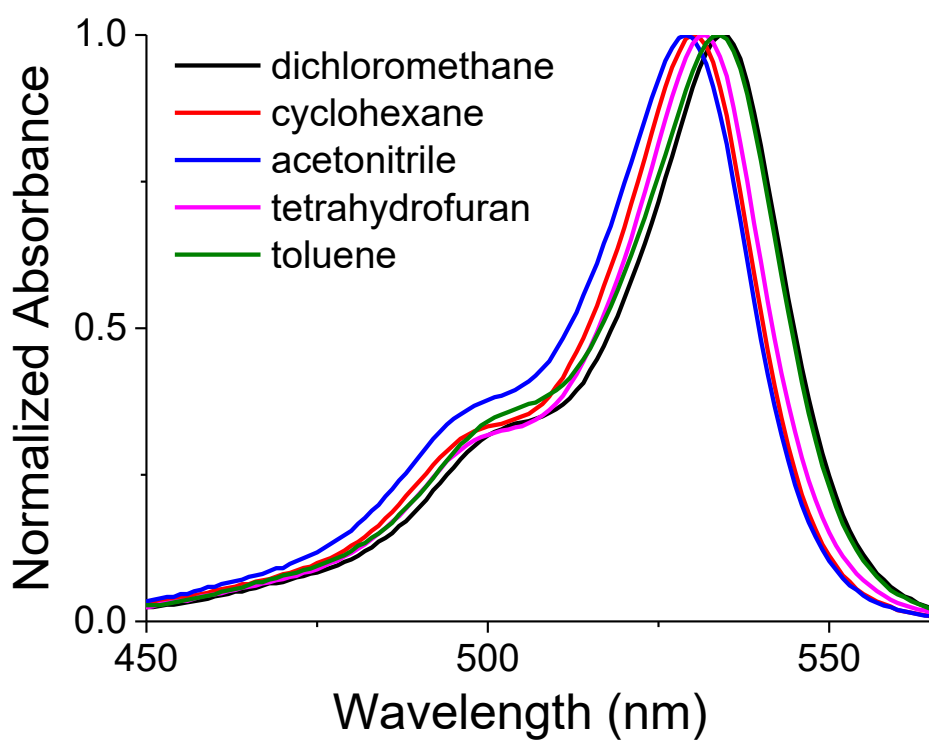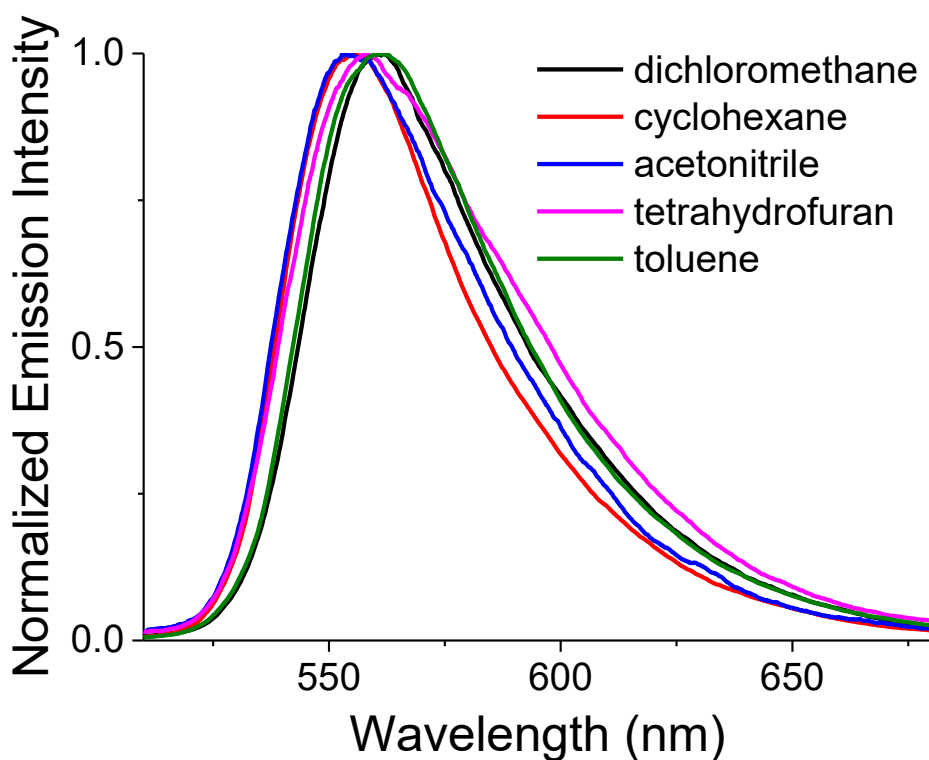

**Figure S4.** Normalized UV-vis (top) and fluorescence spectra (bottom) of **1a** (5 μM) in different solvents, excited at 500 nm.



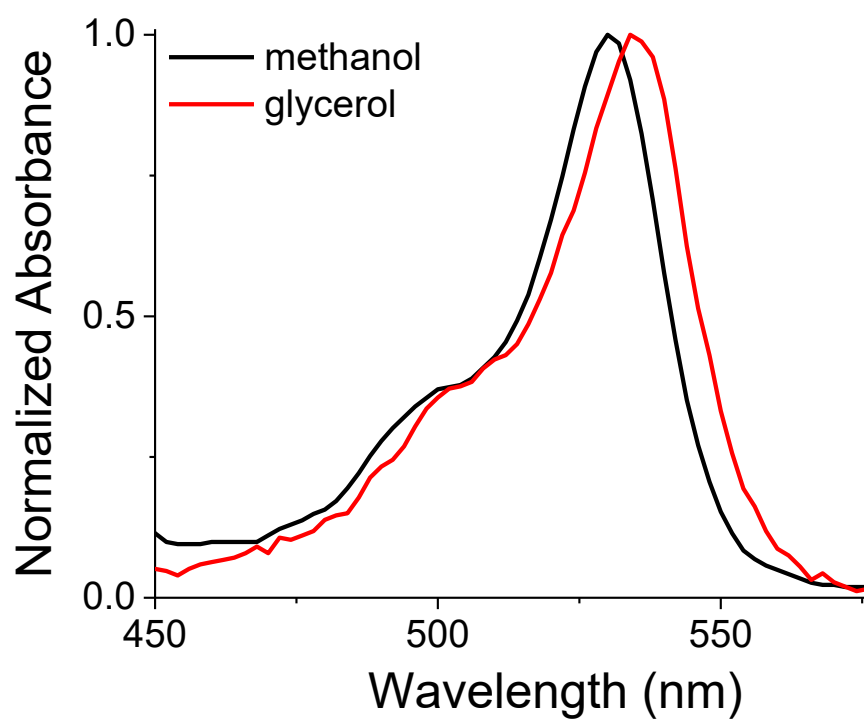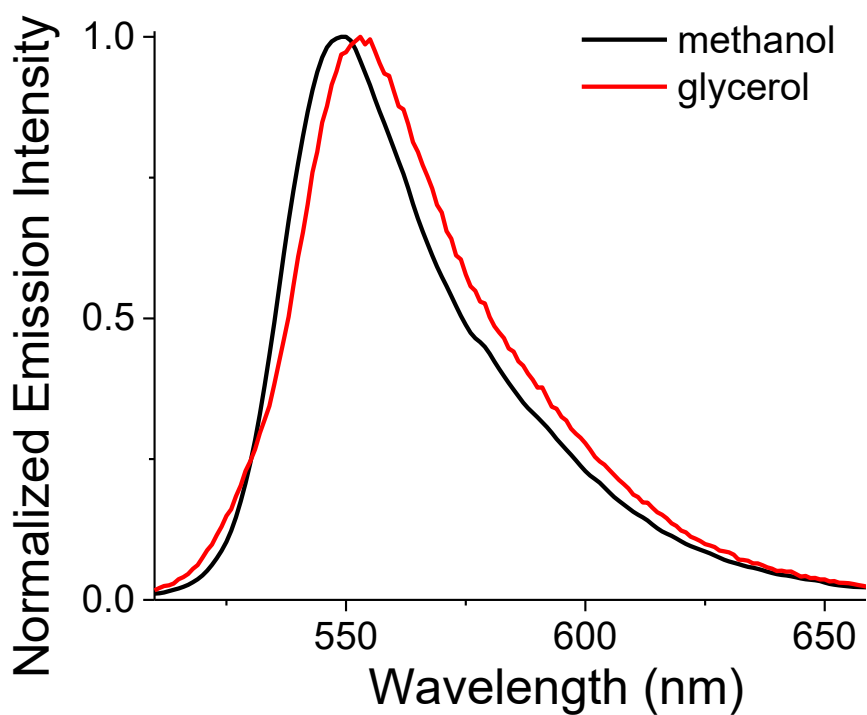

**Figure S5.** Normalized UV-vis (top) and fluorescence spectra (bottom) of **1a** (5  $\mu\text{M}$ ) in methanol and glycerol, excited at 500 nm.

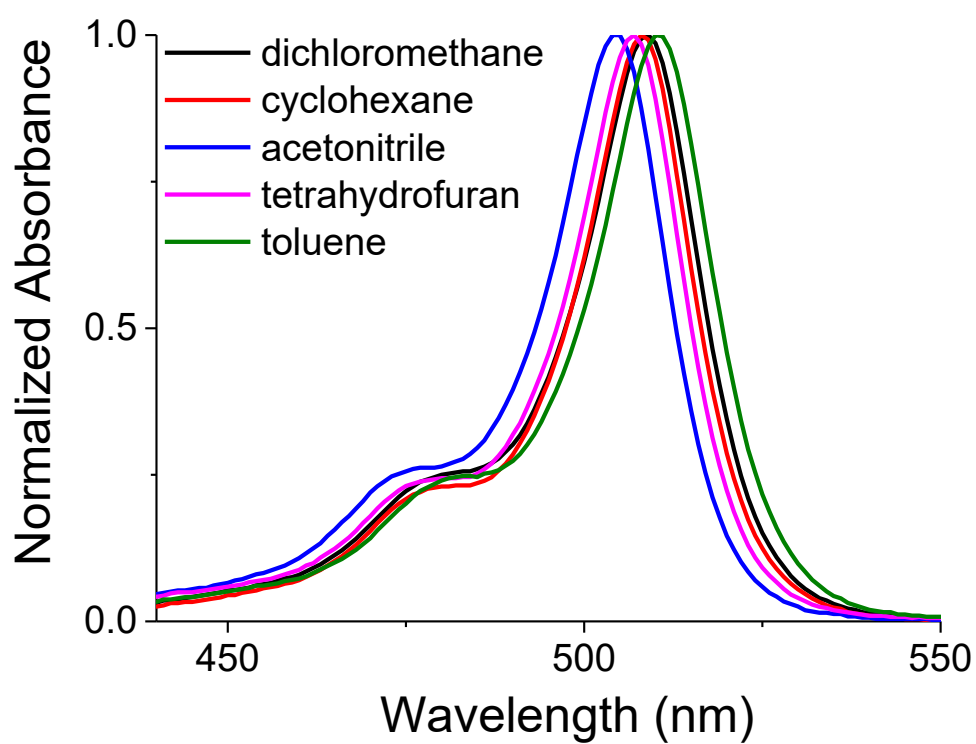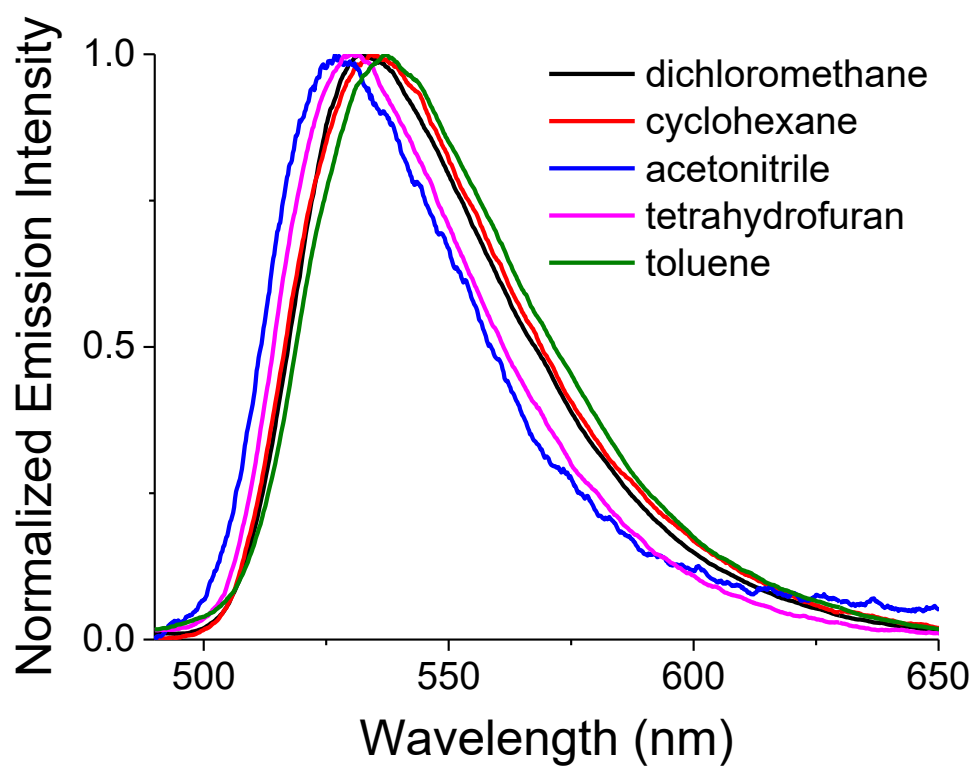

**Figure S6.** Normalized UV-vis (top) and fluorescence spectra (bottom) of **1b** (5  $\mu\text{M}$ ) in different solvents, excited at 480 nm.

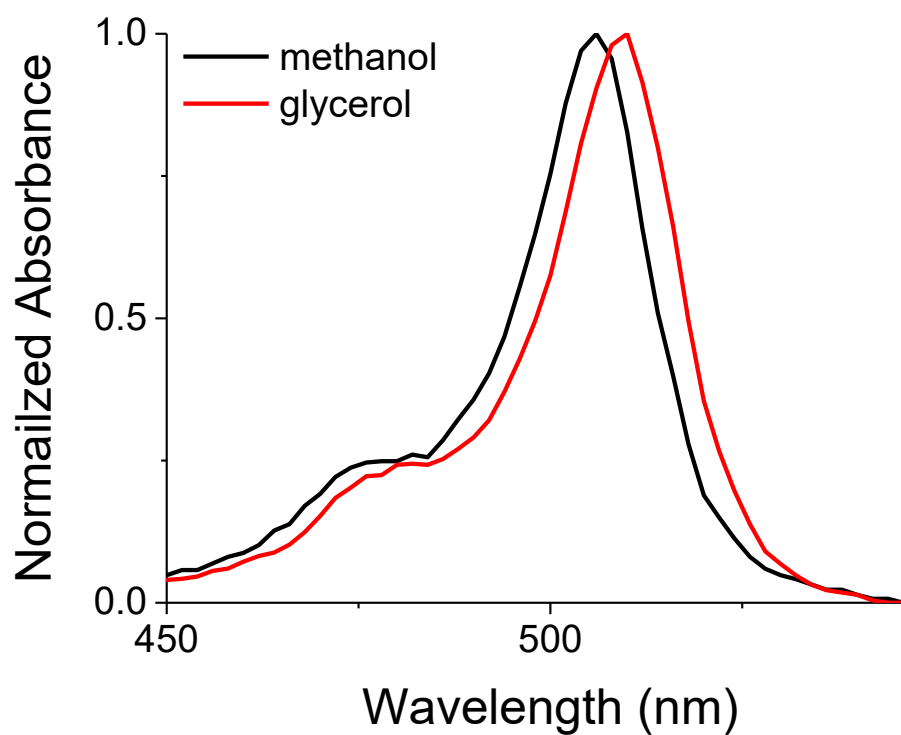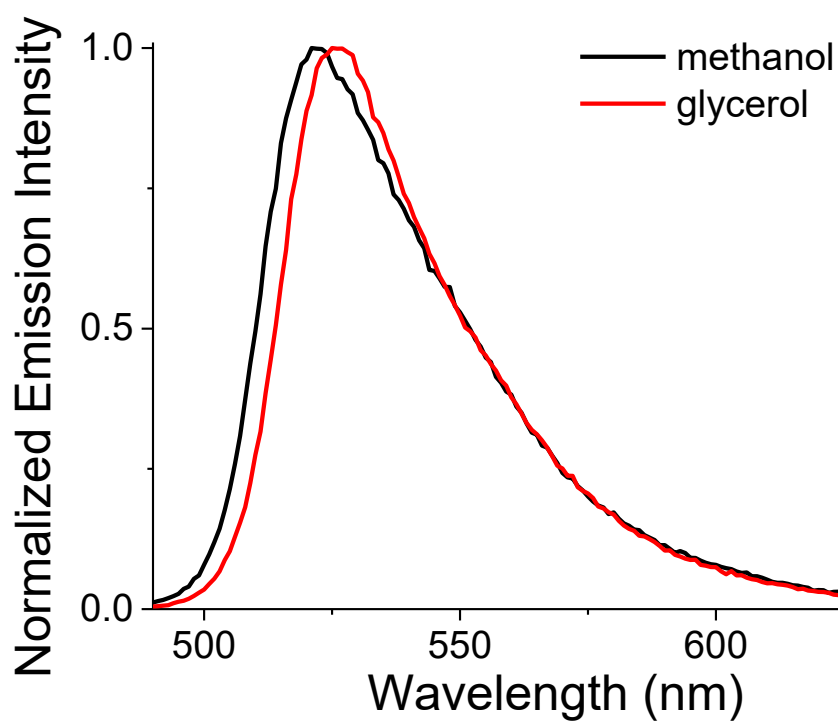

**Figure S7.** Normalized UV-vis (top) and fluorescence spectra (bottom) of **1b** (5  $\mu\text{M}$ ) in methanol and glycerol, excited at 480 nm.

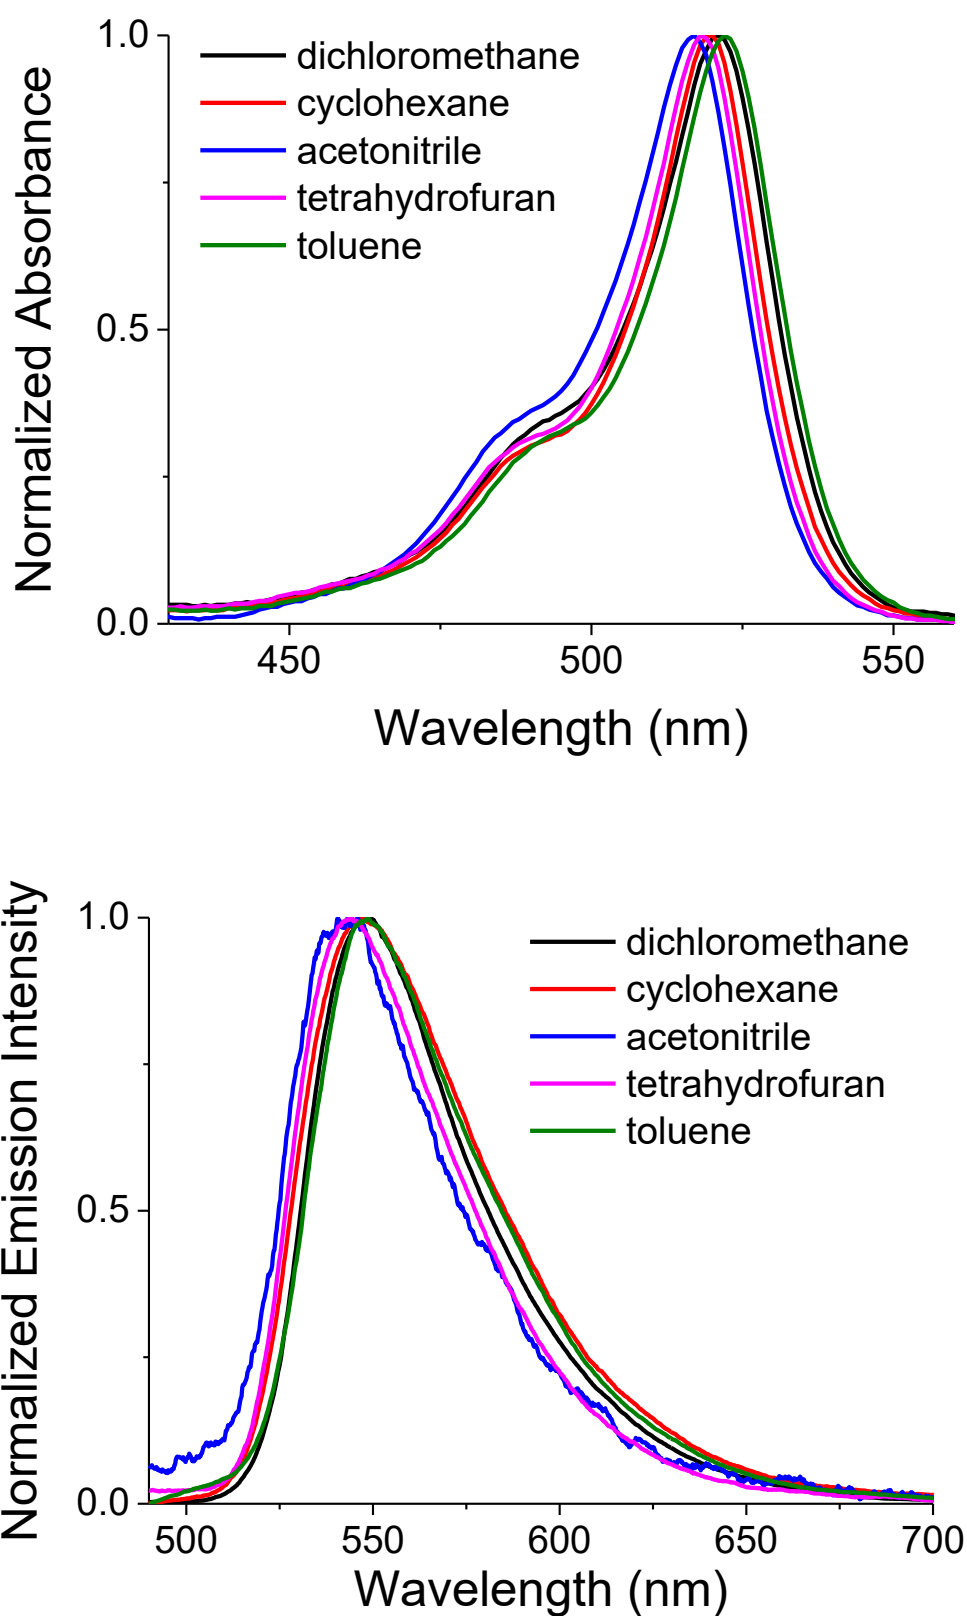

**Figure S8.** Normalized UV-vis (top) and fluorescence spectra (bottom) of **1c** in different solvents, excited at 480 nm.

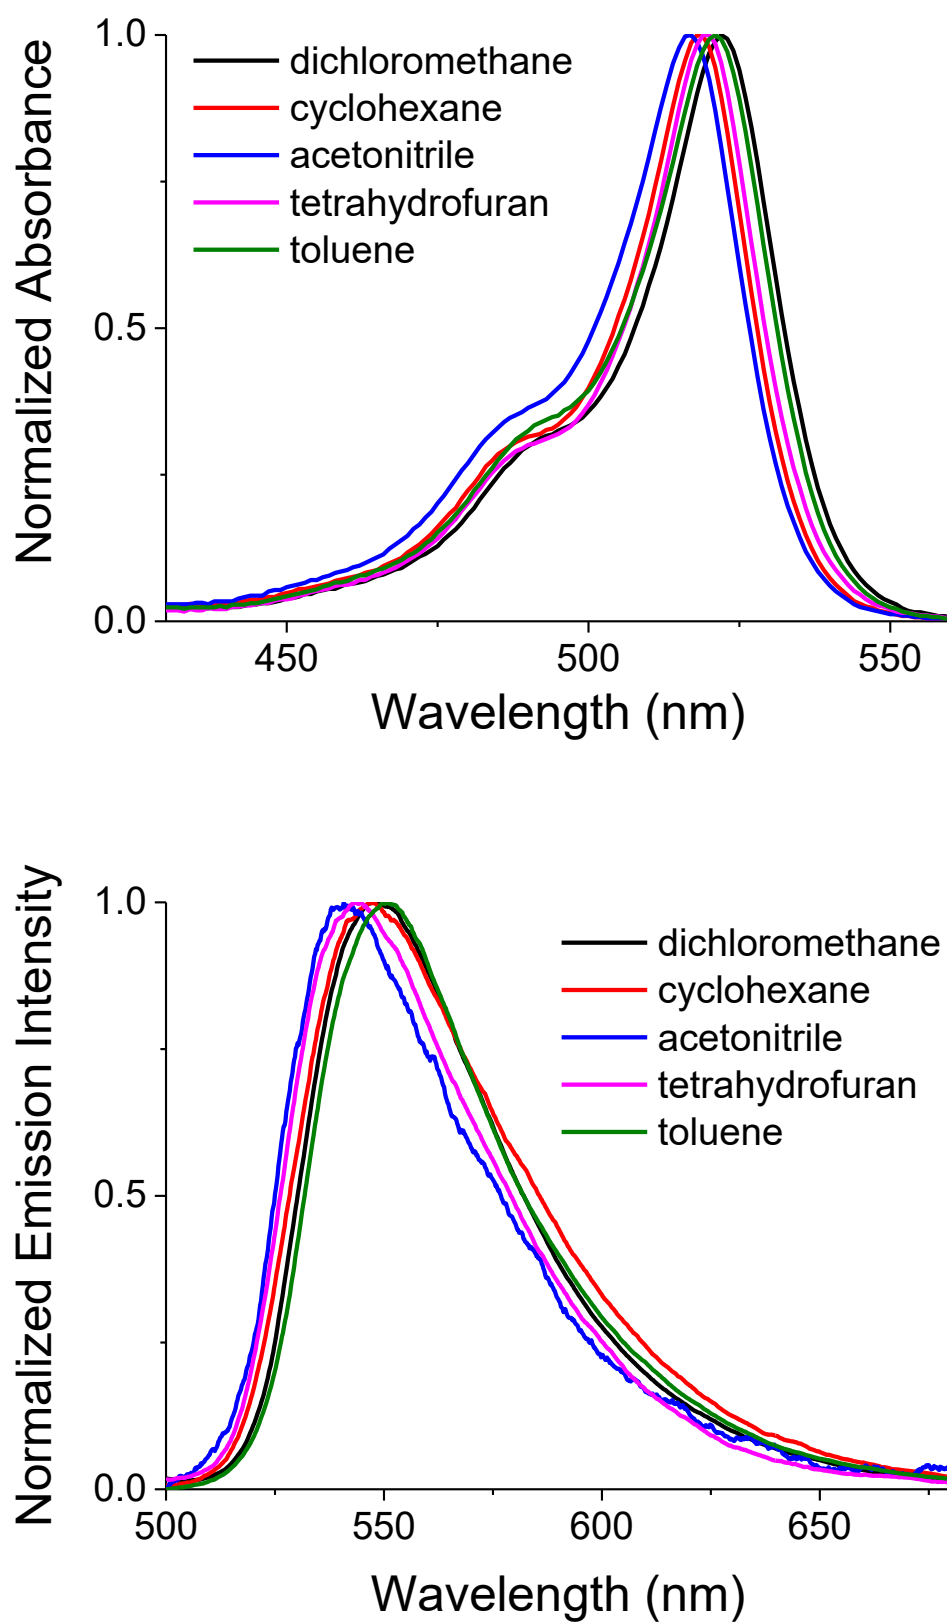

**Figure S9.** Normalized UV-vis (top) and fluorescence spectra (bottom) of **1d** in different solvents, excited at 480 nm.

### 3. Aggregation-induced emission properties

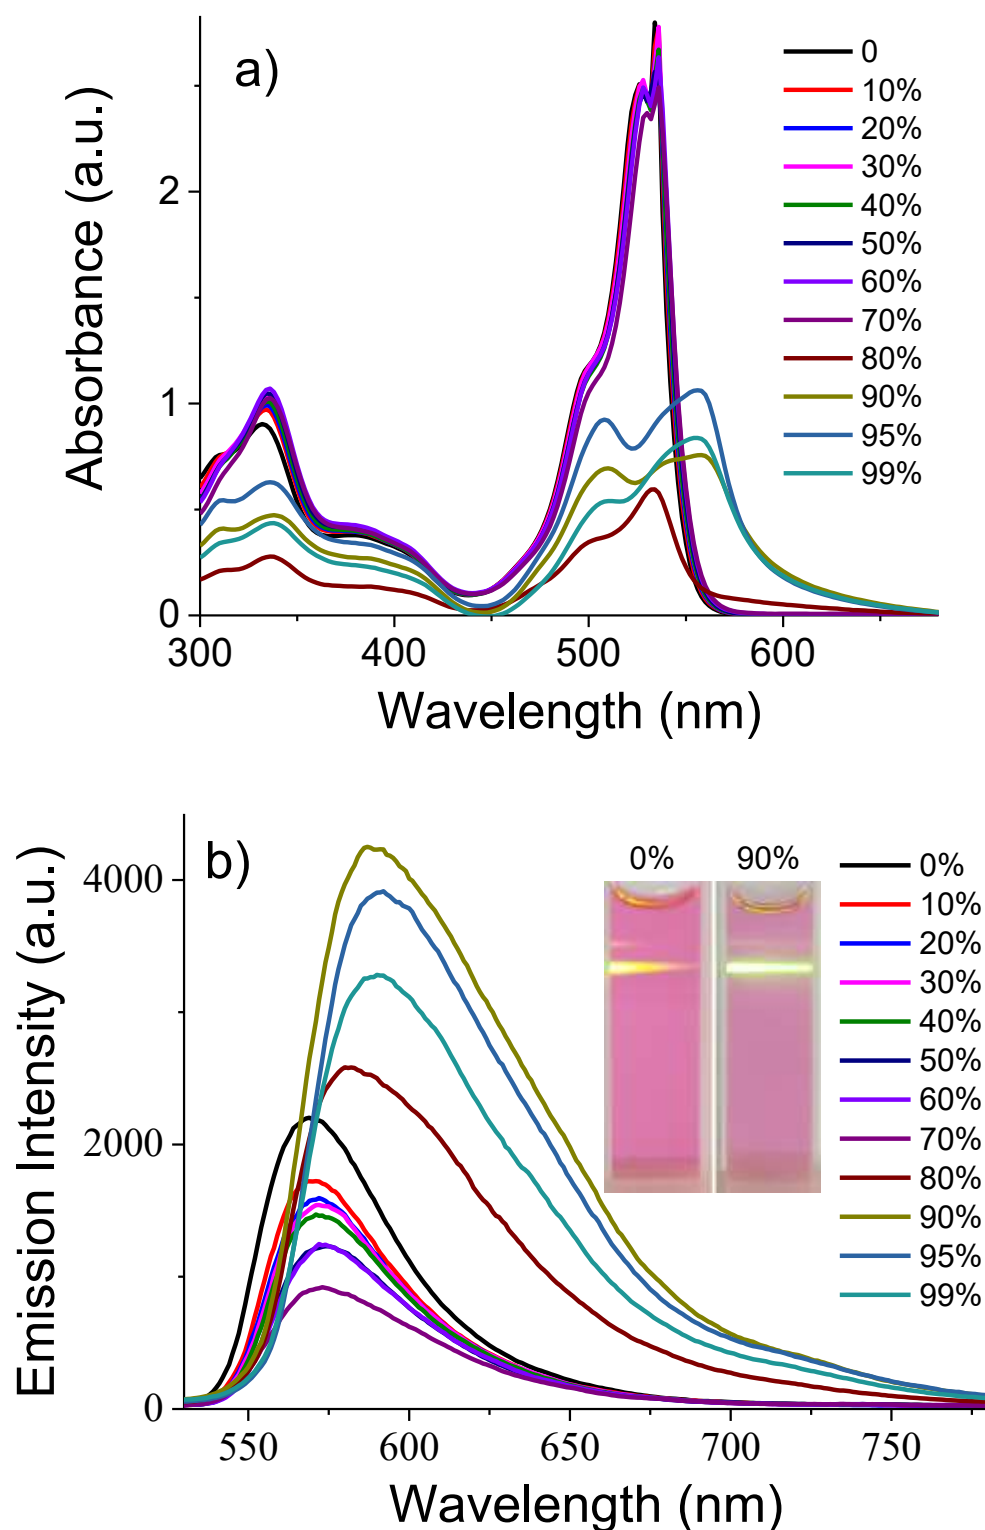

**Figure S10.** Absorbance (a) and fluorescence (b) spectra of **1a** (50  $\mu\text{M}$ ) in acetonitrile/water with different water fractions ( $f_w$ ), excited at 500 nm. Photographs of acetonitrile and the mixed acetonitrile-water system containing 90% water of **1a** under 365 nm handheld UV lamp irradiation condition.

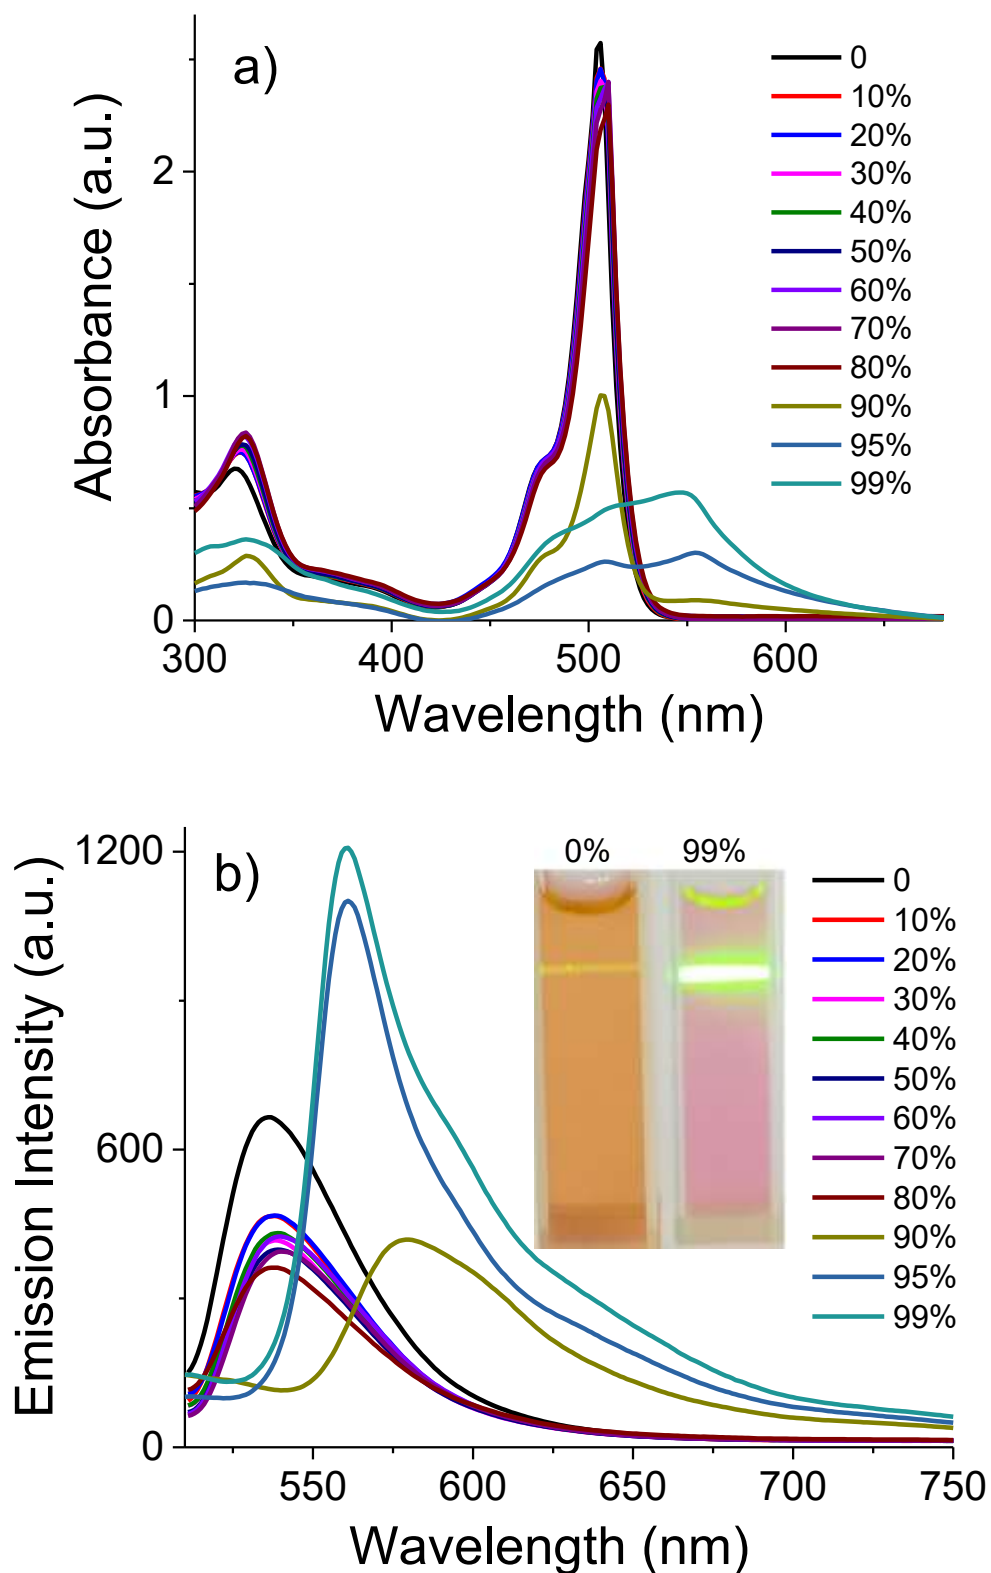

**Figure S11.** Absorbance (a) and fluorescence (b) spectra of **1b** (30  $\mu\text{M}$ ) in acetonitrile/water with different water fractions ( $f_w$ ), excited at 480 nm. Photographs of acetonitrile and the mixed acetonitrile-water system containing 99% water of **1b** under 365 nm handheld UV lamp irradiation condition.

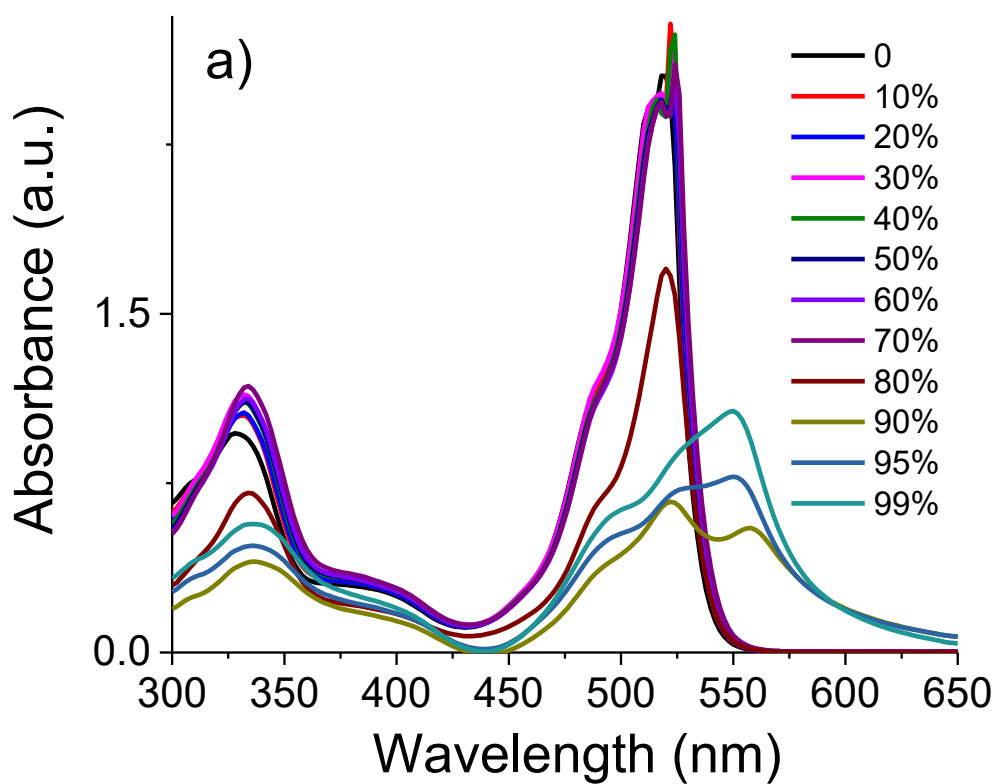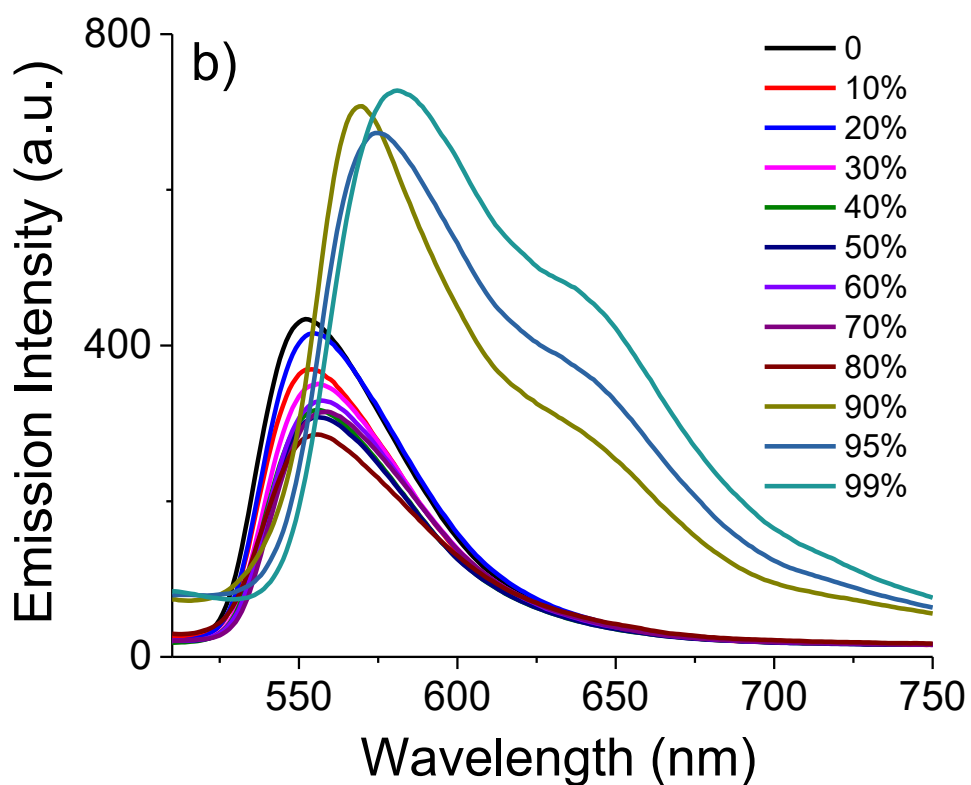

**Figure S12.** Absorbance (a) and fluorescence (b) spectra of **1c** (30  $\mu\text{M}$ ) in acetonitrile/water with different water fractions ( $f_w$ ), excited at 480 nm.



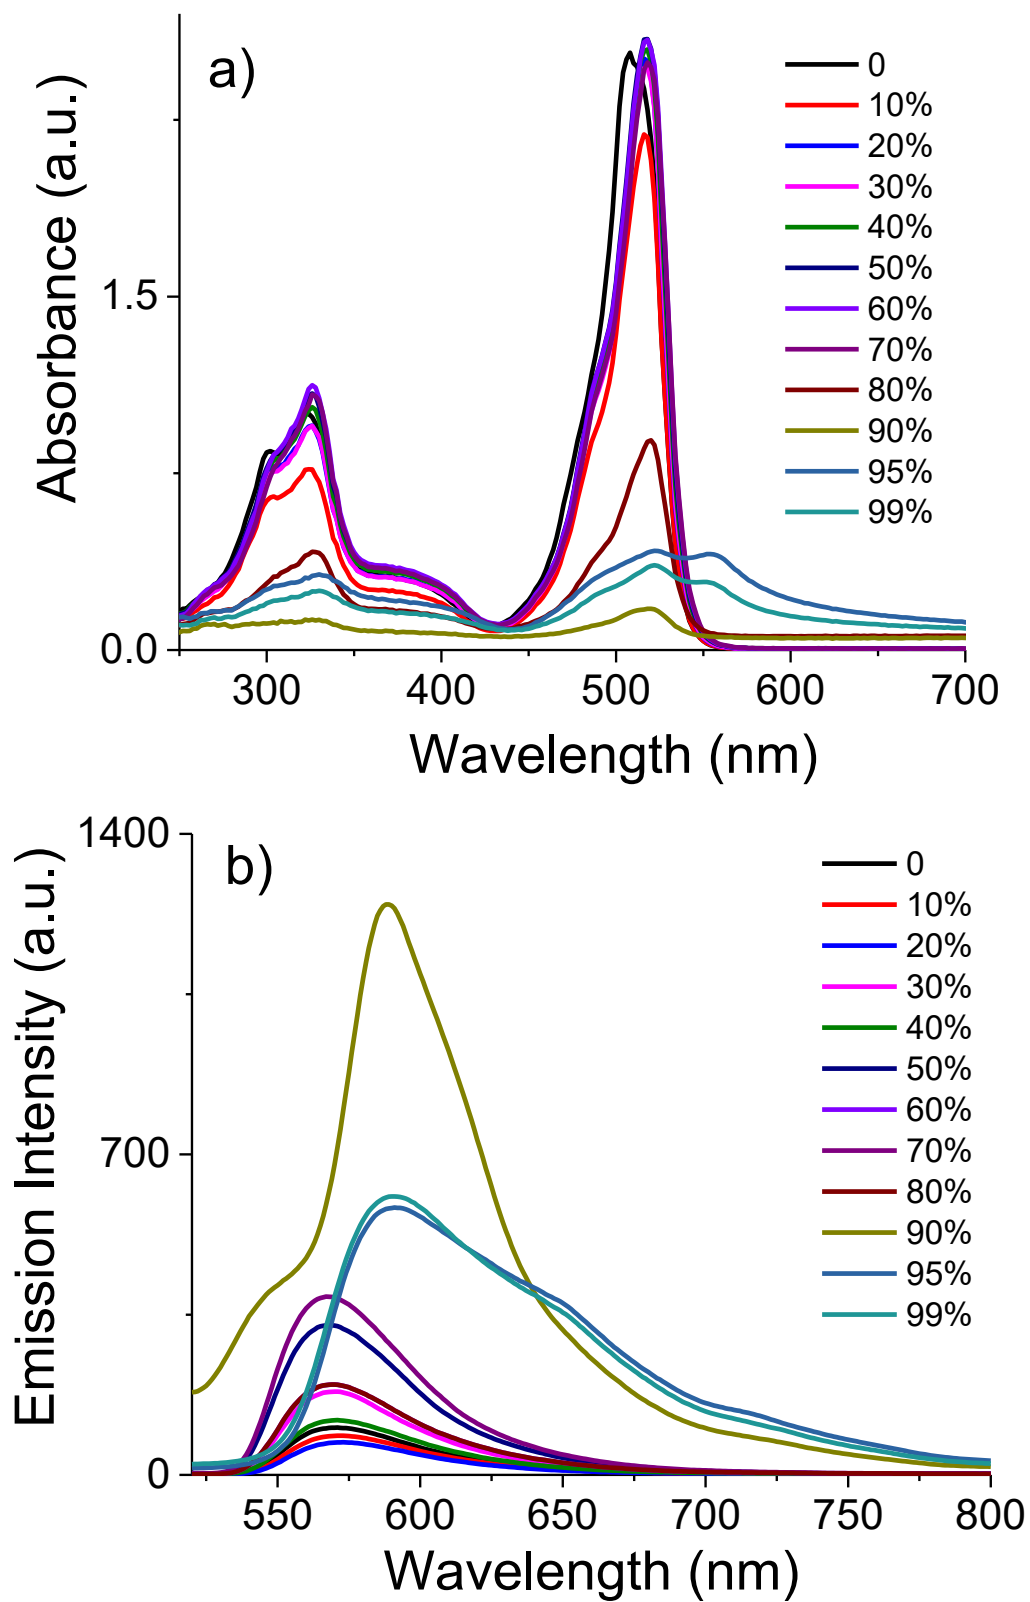

**Figure S13.** Absorbance (a) and fluorescence (b) spectra of **1d** (30  $\mu\text{M}$ ) in acetonitrile/water with different water fractions ( $f_w$ ), excited at 480 nm.

#### 4. SEM and TEM images

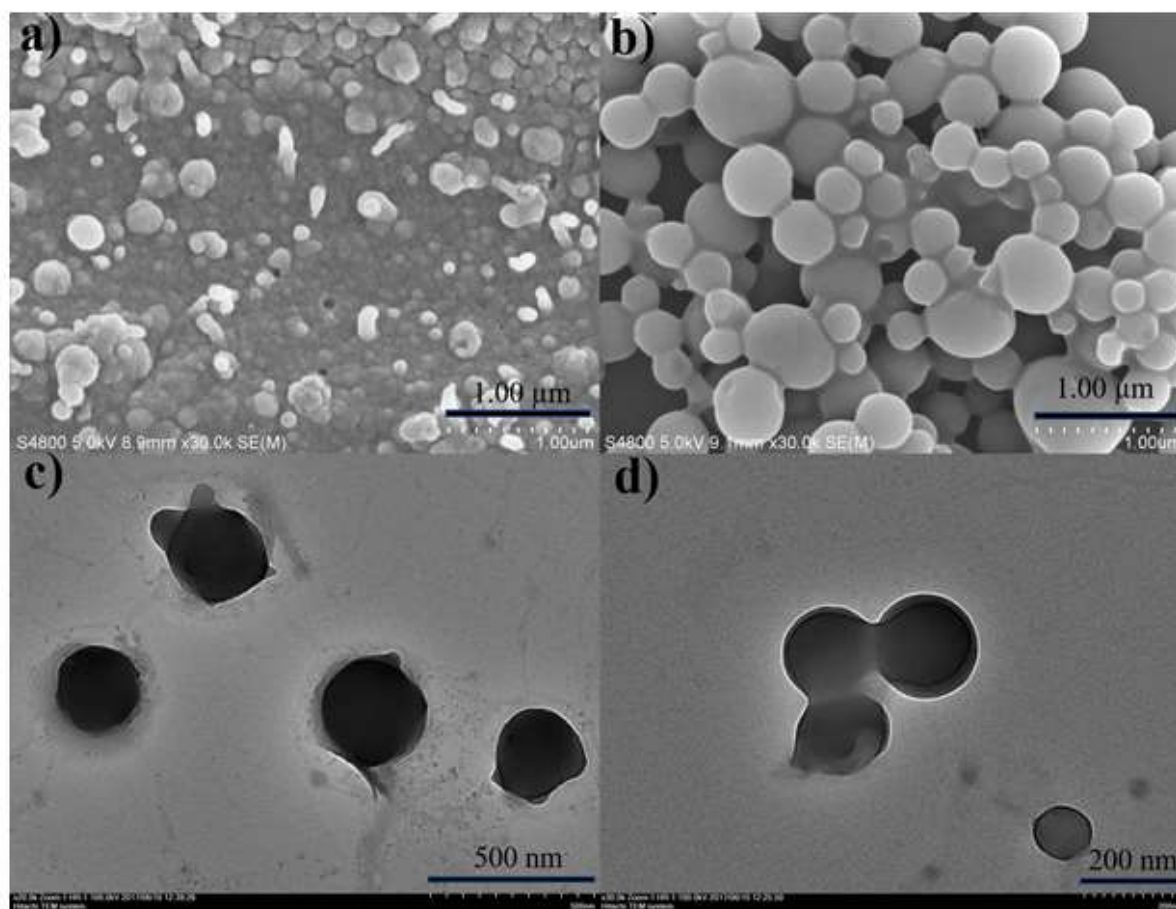

**Figure S14.** SEM (a, b) and TEM (c, d) images of nanoballs for **1c** (30 μM) and nanocuboid for **1d** (30 μM) in acetonitrile-water system with  $f_w = 90\%$ .

## 5. Dynamic light scattering

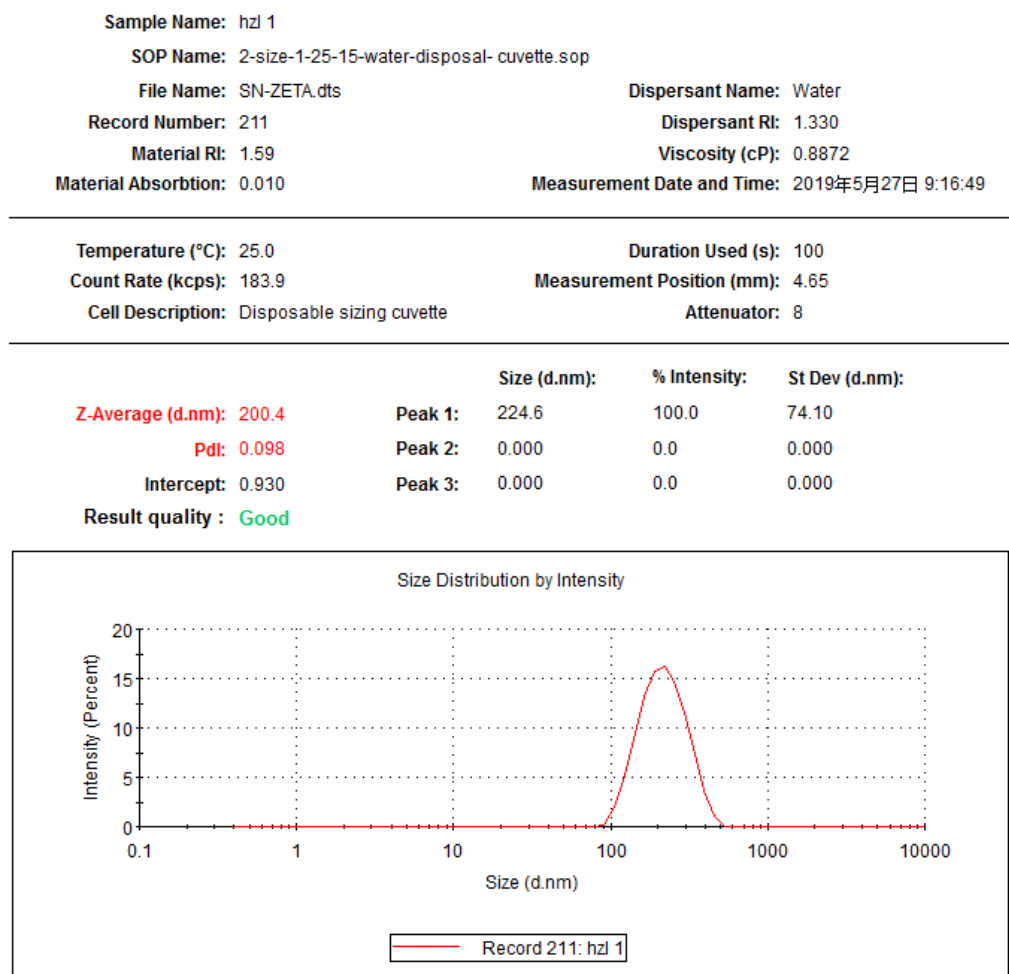

**Figure S15.** Dynamic light scattering (DLS) of the nanoparticles **1a** (50  $\mu\text{M}$ ) in acetonitrile-water system with water fraction equal to 99%.

**Sample Name:** 1 1  
**SOP Name:** 2-size-1-25-15-water-disposal- cuvette.sop  
**File Name:** dspe-1-zeta.dts **Dispersant Name:** Water  
**Record Number:** 220 **Dispersant RI:** 1.330  
**Material RI:** 1.59 **Viscosity (cP):** 0.8872  
**Material Absorbion:** 0.010 **Measurement Date and Time:** 2019年5月23日 10:16:19

**Temperature (°C):** 25.0 **Duration Used (s):** 100  
**Count Rate (kcps):** 355.3 **Measurement Position (mm):** 4.65  
**Cell Description:** Disposable sizing cuvette **Attenuator:** 9

|                                | Size (d.nm):         | % Intensity: | St Dev (d.nm): |
|--------------------------------|----------------------|--------------|----------------|
| <b>Z-Average (d.nm):</b> 347.1 | <b>Peak 1:</b> 301.3 | 100.0        | 68.36          |
| <b>PdI:</b> 0.283              | <b>Peak 2:</b> 0.000 | 0.0          | 0.000          |
| <b>Intercept:</b> 0.825        | <b>Peak 3:</b> 0.000 | 0.0          | 0.000          |

**Result quality :** Good

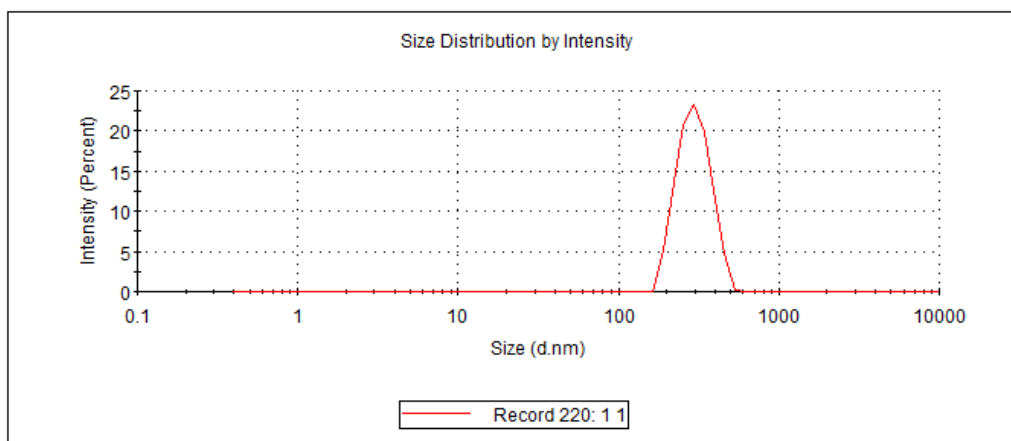

**Figure S16.** Dynamic light scattering (DLS) of the nanoparticles **1b** (30  $\mu$ M) in acetonitrile-water system with water fraction equal to 99%.

## 6. Viscosity sensitivity studies

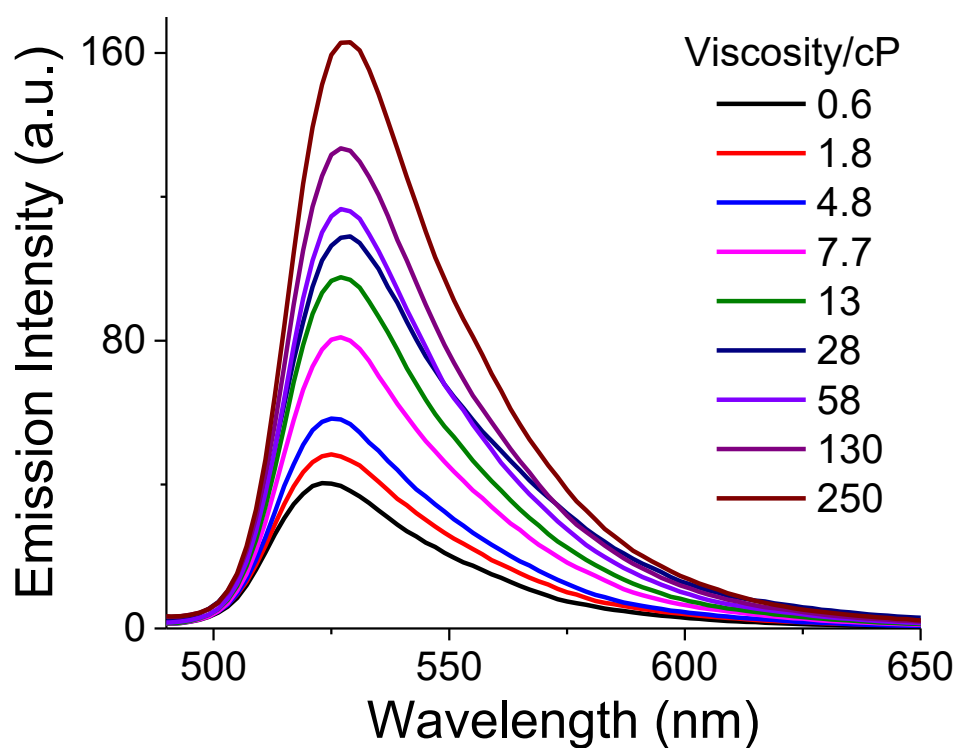

**Figure S17.** Changes of fluorescence intensity of **1b** (5  $\mu\text{M}$ , excited at 480 nm) in methanol-glycerol system with the variation of solution viscosity.

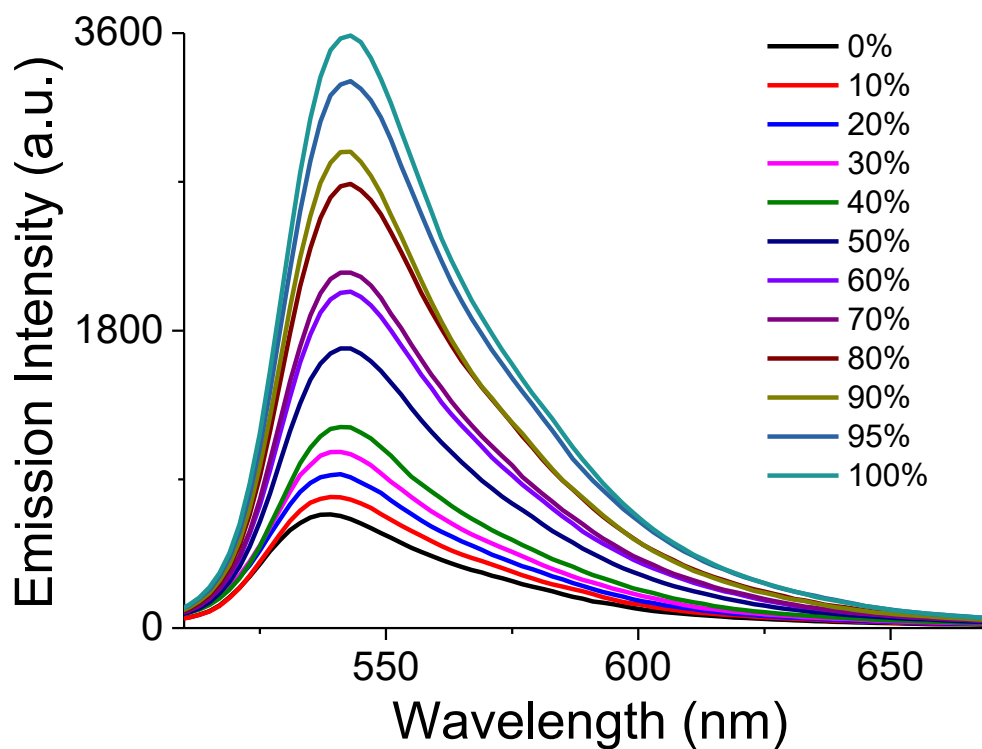

**Figure S18.** Viscosity change of the absorbance and fluorescence emission spectra of **1c** (5  $\mu\text{M}$ ) in methanol-glycerol mixtures, excited at 500 nm.

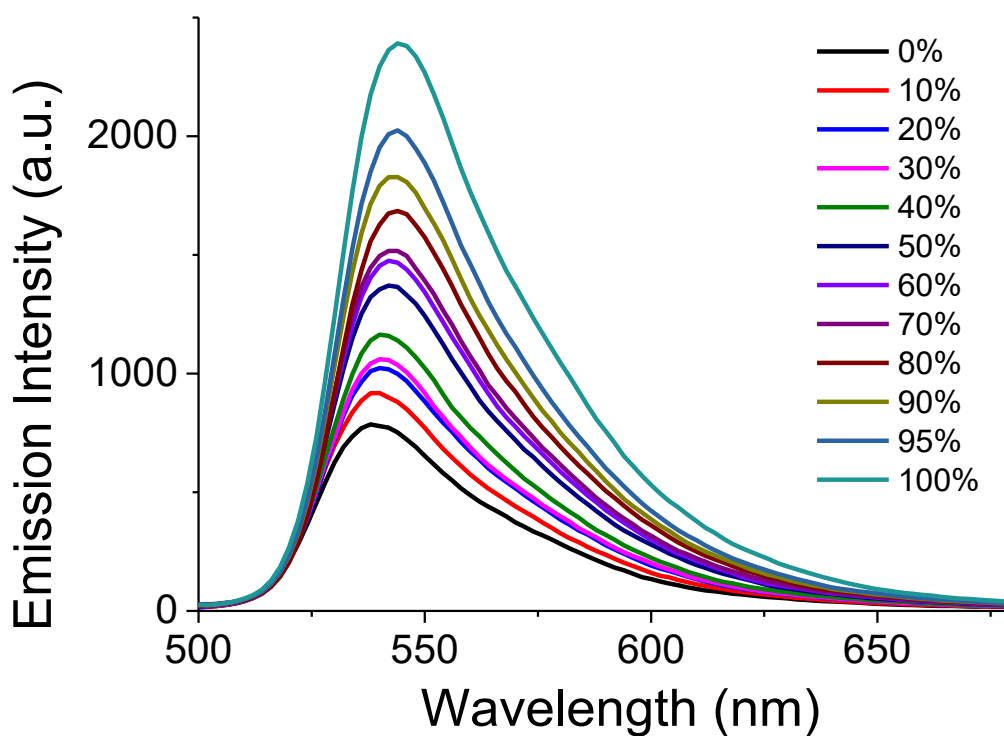

**Figure S19.** Viscosity change of the absorbance and fluorescence emission spectra of **1d** (5  $\mu\text{M}$ ) in methanol-glycerol mixtures, excited at 480 nm.

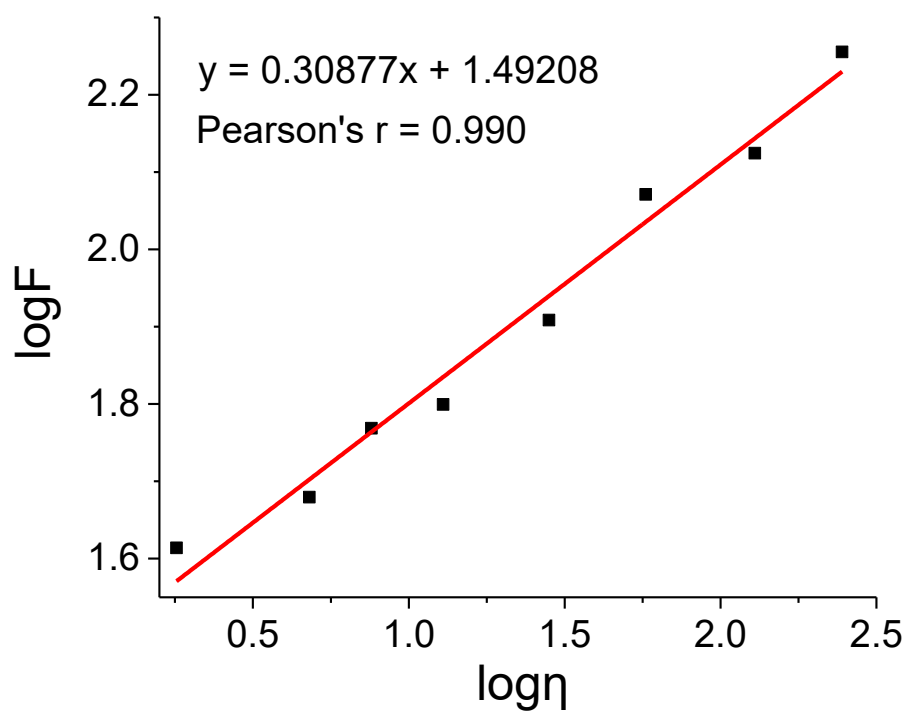

**Figure S20.** The linear relationship of **1b** between the fluorescent intensity and the viscosity  $\eta$ .

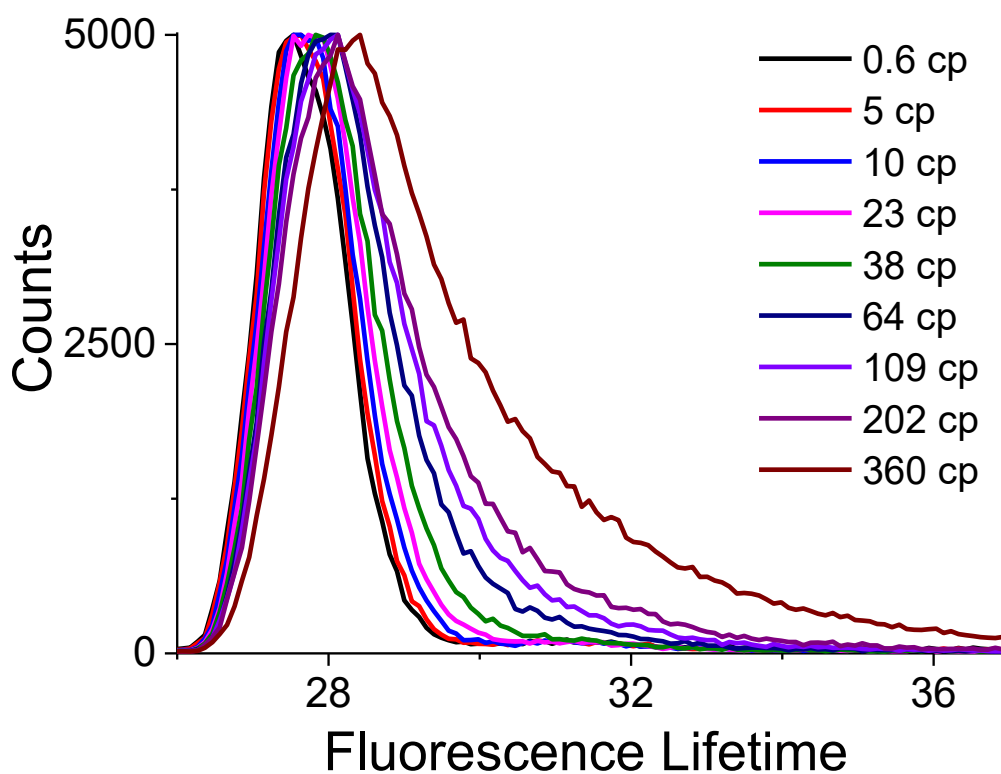

**Figure S21.** The fluorescence lifetime spectra of **1b** with different viscosity collected at 560 nm.

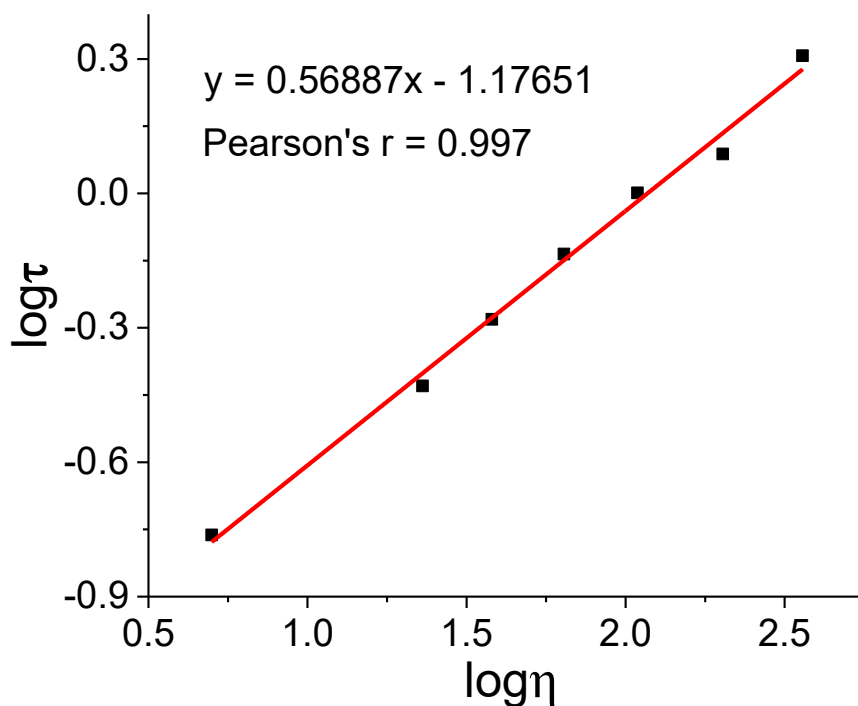

**Figure S22.** The linear relationship of **1b** between the fluorescence lifetime and the viscosity  $\eta$ .

## 7. Cell culture

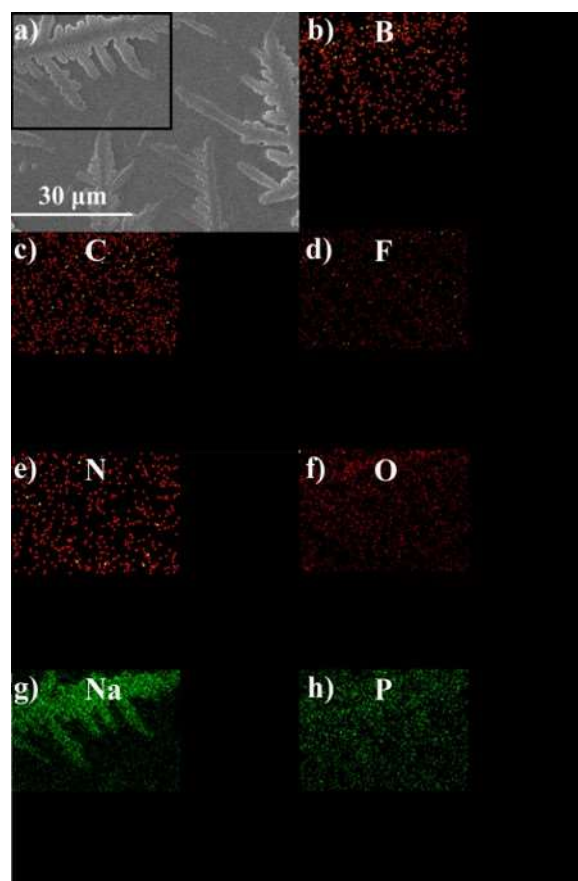

**Figure S23.** a) SEM image of BODIPY 1a (5  $\mu\text{M}$ ) in phosphate-buffered saline (PBS) and EDS mapping in the rectangle frame for B (b), C (c), F (d), N (e), O (f), Na (g) and P (h).

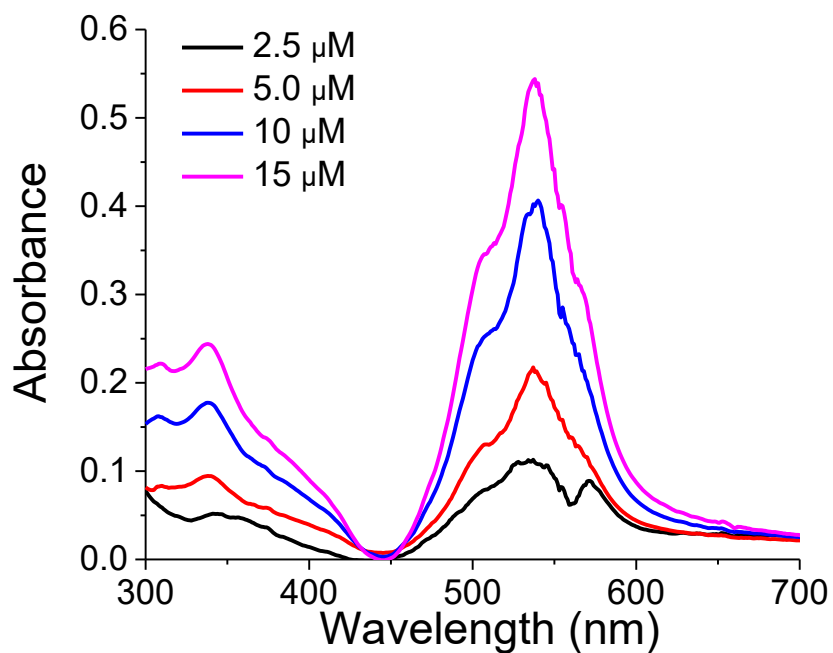

**Figure S24.** Absorbance of BODIPY 1a with different concentrations of 2.5  $\mu\text{M}$ , 5  $\mu\text{M}$ , 10  $\mu\text{M}$  and 15  $\mu\text{M}$  in dulbecco's modified eagle medium (DMEM).



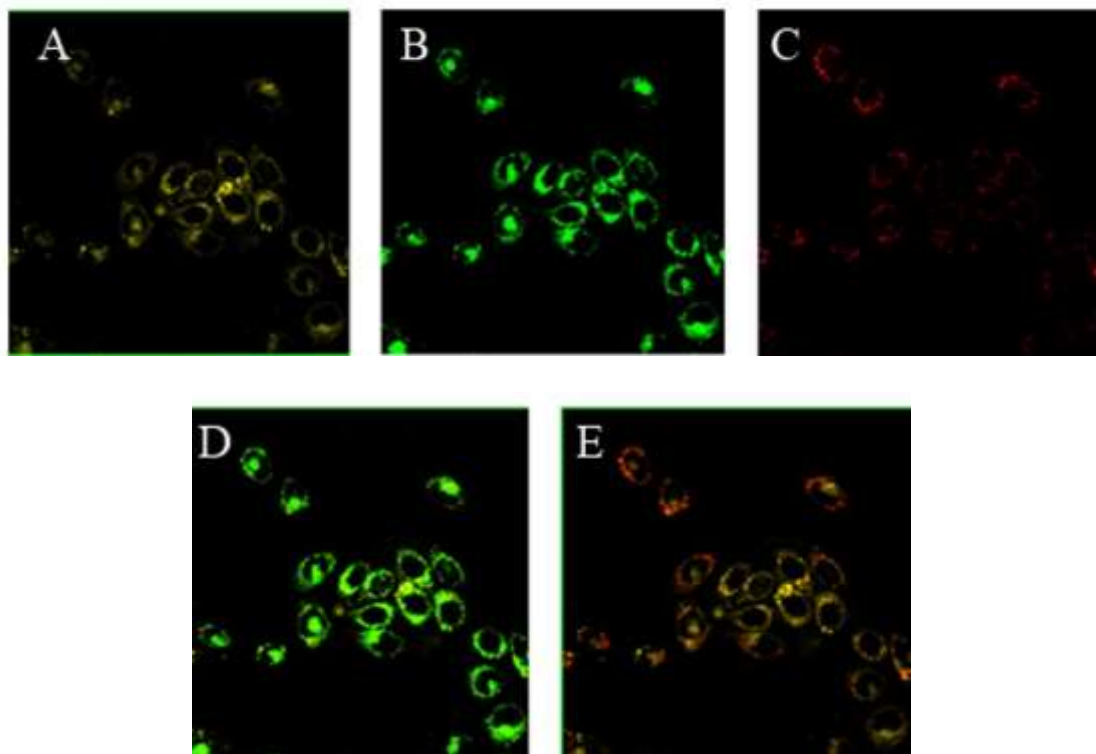

**Figure 25.** Co-location imaging studies in MCF-7 cells: (A) Stained with **1a** (5  $\mu$ M,  $\lambda_{\text{ex}}$  = 515 nm,  $\lambda_{\text{em}}$  = 520-600 nm); (B) Stained with DND-99 (1  $\mu$ M,  $\lambda_{\text{ex}}$  = 559 nm,  $\lambda_{\text{em}}$  = 575-620 nm); (C) Stained with Mito Deep Red (1  $\mu$ M  $\lambda_{\text{ex}}$  = 635 nm,  $\lambda_{\text{em}}$  = 655-755 nm); (D) Merge of A and B; (E) Merge of A and C.

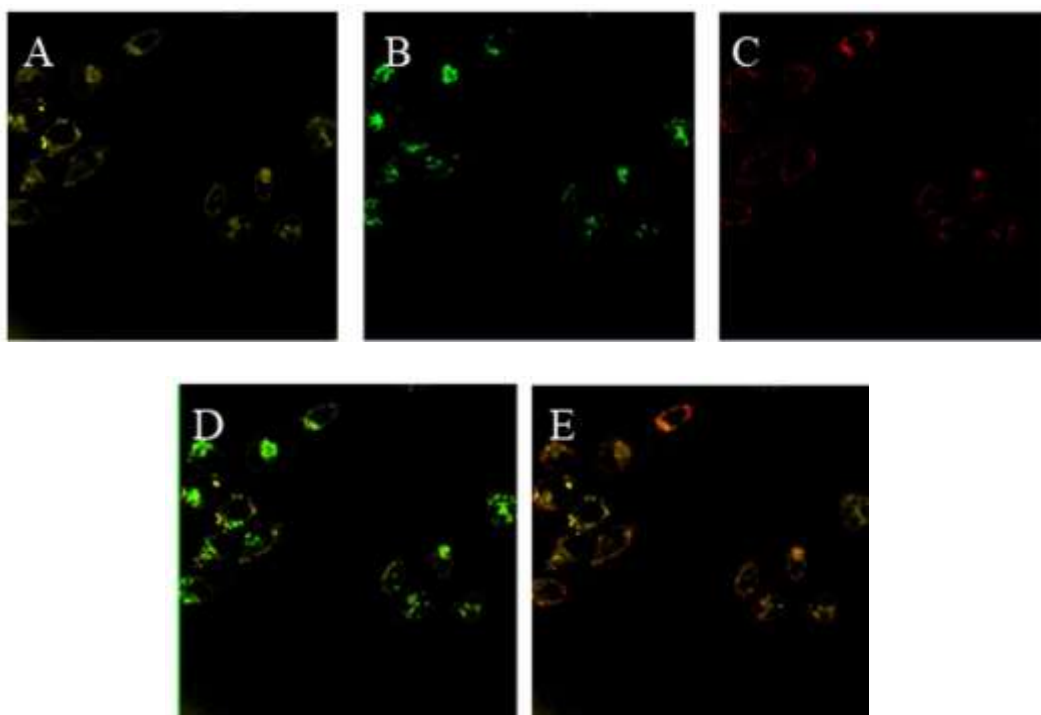

**Figure 26.** Co-location imaging studies in MCF-7 cells: (A) Stained with **1b** (5  $\mu$ M,  $\lambda_{ex}$  = 515 nm,  $\lambda_{em}$  = 520-600 nm); (B) Stained with DND-99 (1  $\mu$ M,  $\lambda_{ex}$  = 559 nm,  $\lambda_{em}$  = 575-620 nm); (C) Stained with Mito Deep Red (1  $\mu$ M,  $\lambda_{ex}$  = 635 nm,  $\lambda_{em}$  = 655-755 nm); (D) Merge of A and B; (E) Merge of A and C.

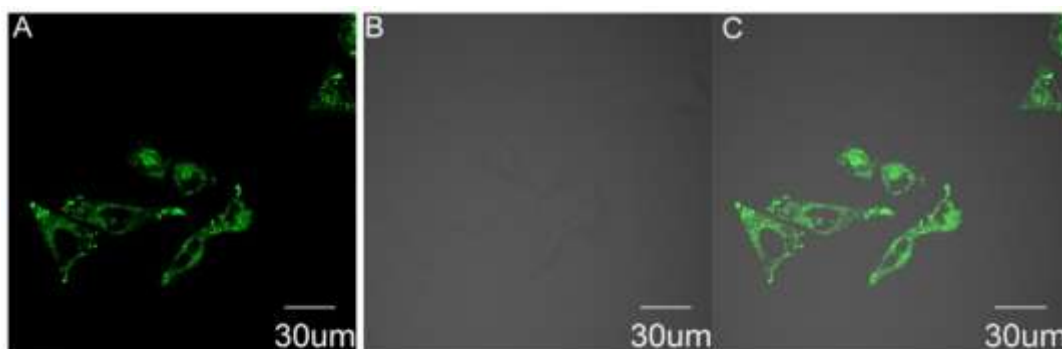

**Figure S27.** Imaging of **1b** in MCF-7 cells. (A) MCF-7 cells were stained with **1b** (5  $\mu$ M,  $\lambda_{ex}$  = 488 nm,  $\lambda_{em}$  = 510-600 nm); (B) DIC image; (C) Merge of A and B.

## 8. MTT Assay

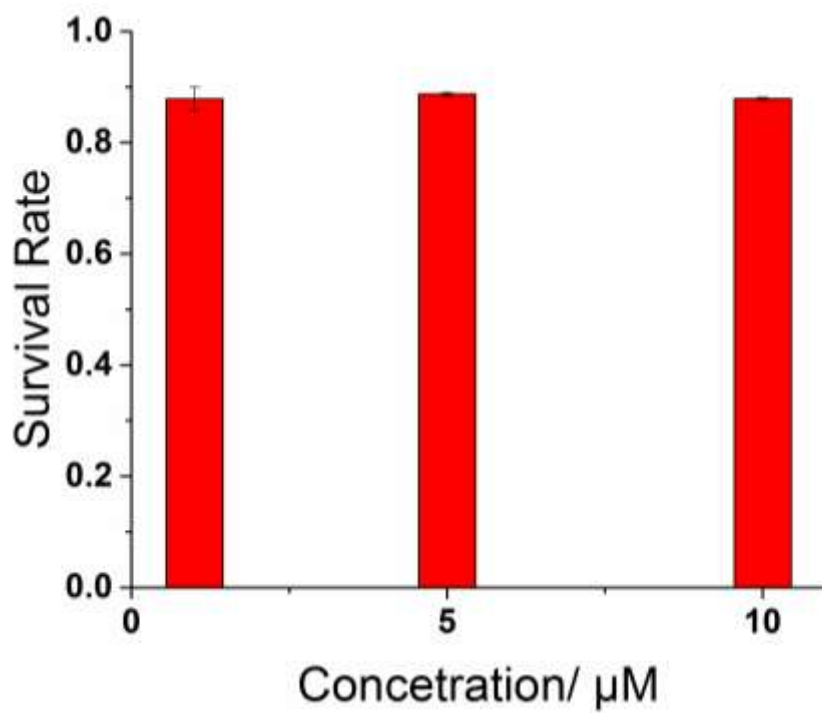

Figure S28. Cell viability of **1a** at different concentrations.

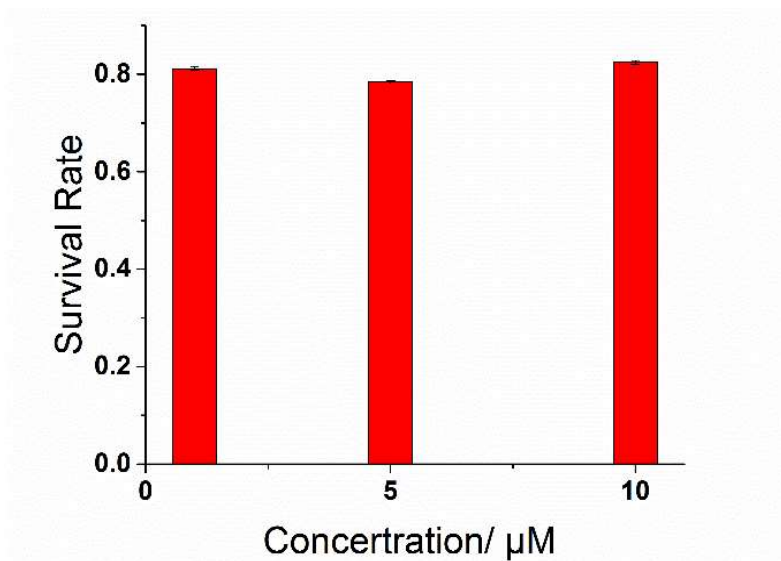

Figure S29. Cell viability of **1b** at different concentrations.

## 9. Viscosity determination in real-time during apoptosis

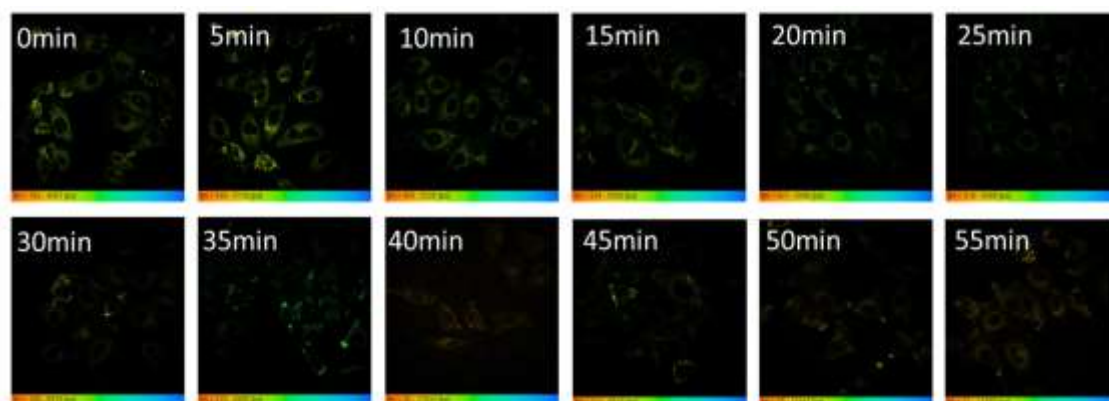

**Figure S30.** FLIM of MCF-7 cells in the absence and presence of etoposide for 0-60 min (A-E); (G) Plots of fluorescence lifetimes of **1a** ( $5 \mu\text{M}$ ) stimulate for different times using etoposide.

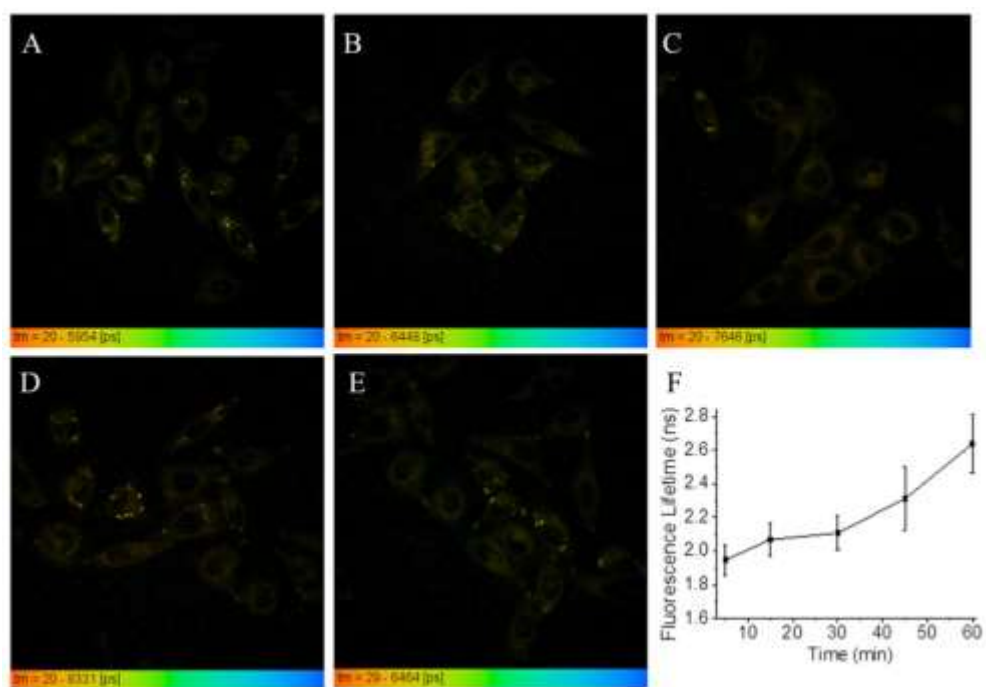

**Figure S31.** FLIM of MCF-7 cells in the absence and presence of etoposide for 0-60 min (A-E); (G) Plots of fluorescence lifetimes of **1b** ( $5 \mu\text{M}$ ) stimulate for different times using etoposide.

## 10. NMR spectra for *meso*-2-ketopyrrolyl BODIPYs

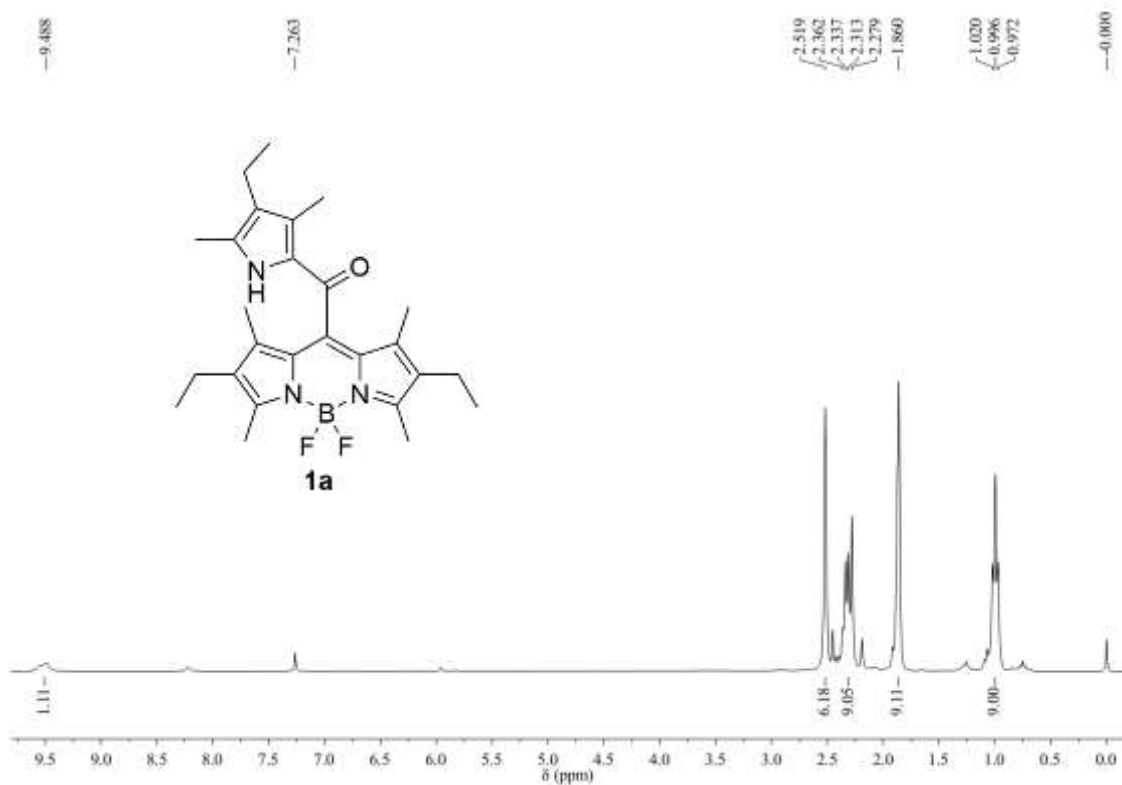

<sup>1</sup>H NMR spectrum of *meso*-2-ketopyrrolyl derived BODIPY **1a** in CDCl<sub>3</sub>

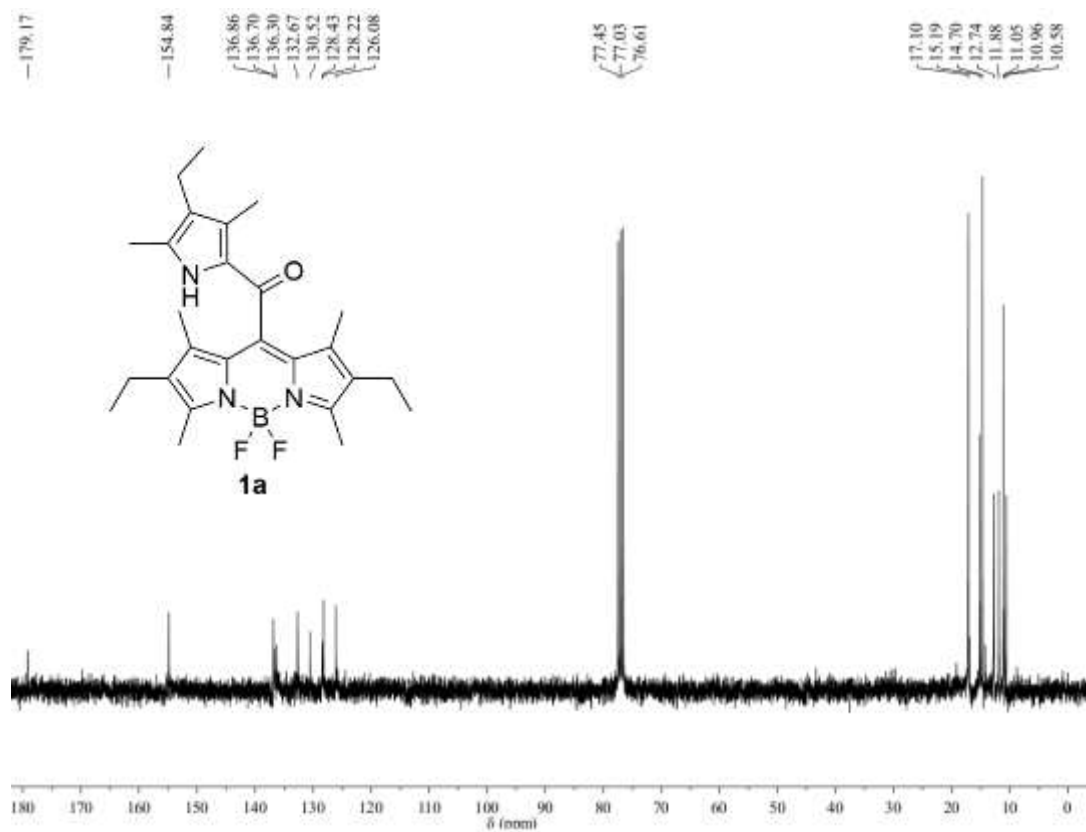

<sup>13</sup>C NMR spectrum of *meso*-2-ketopyrrolyl derived BODIPY **1a** in CDCl<sub>3</sub>

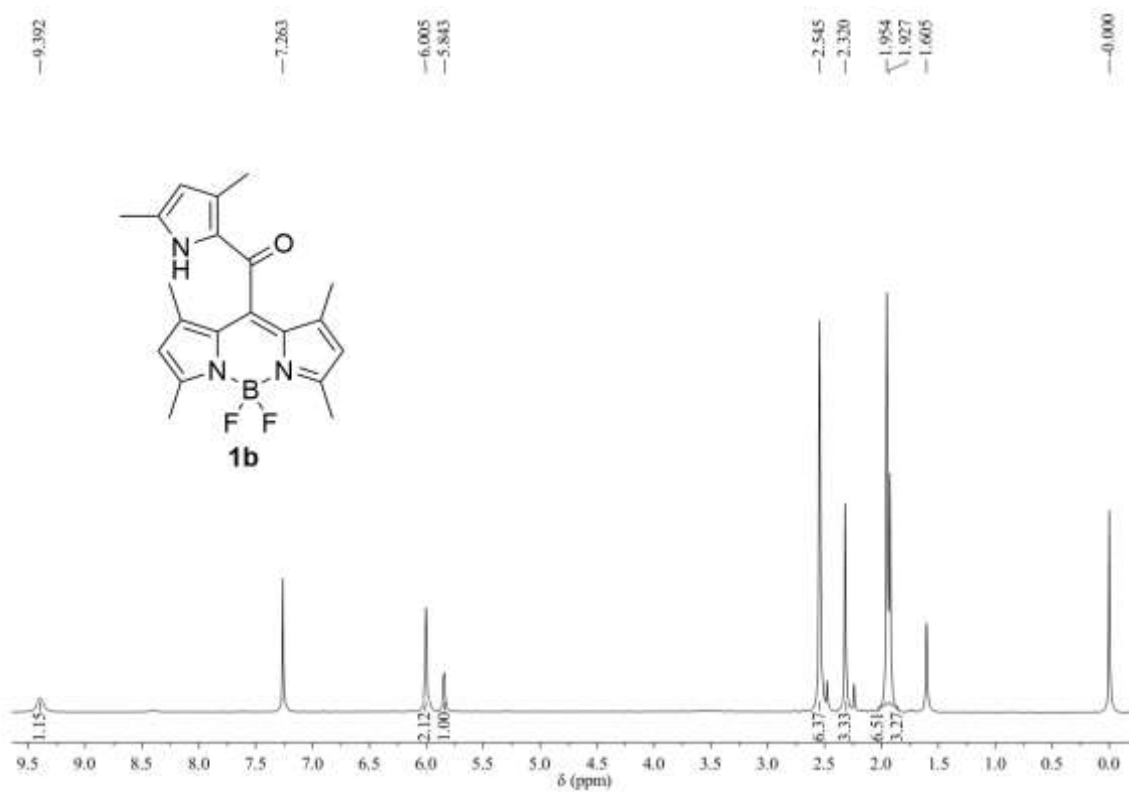

<sup>1</sup>H NMR spectrum of *meso*-2-ketopyrrolyl derived BODIPY **1b** in CDCl<sub>3</sub>

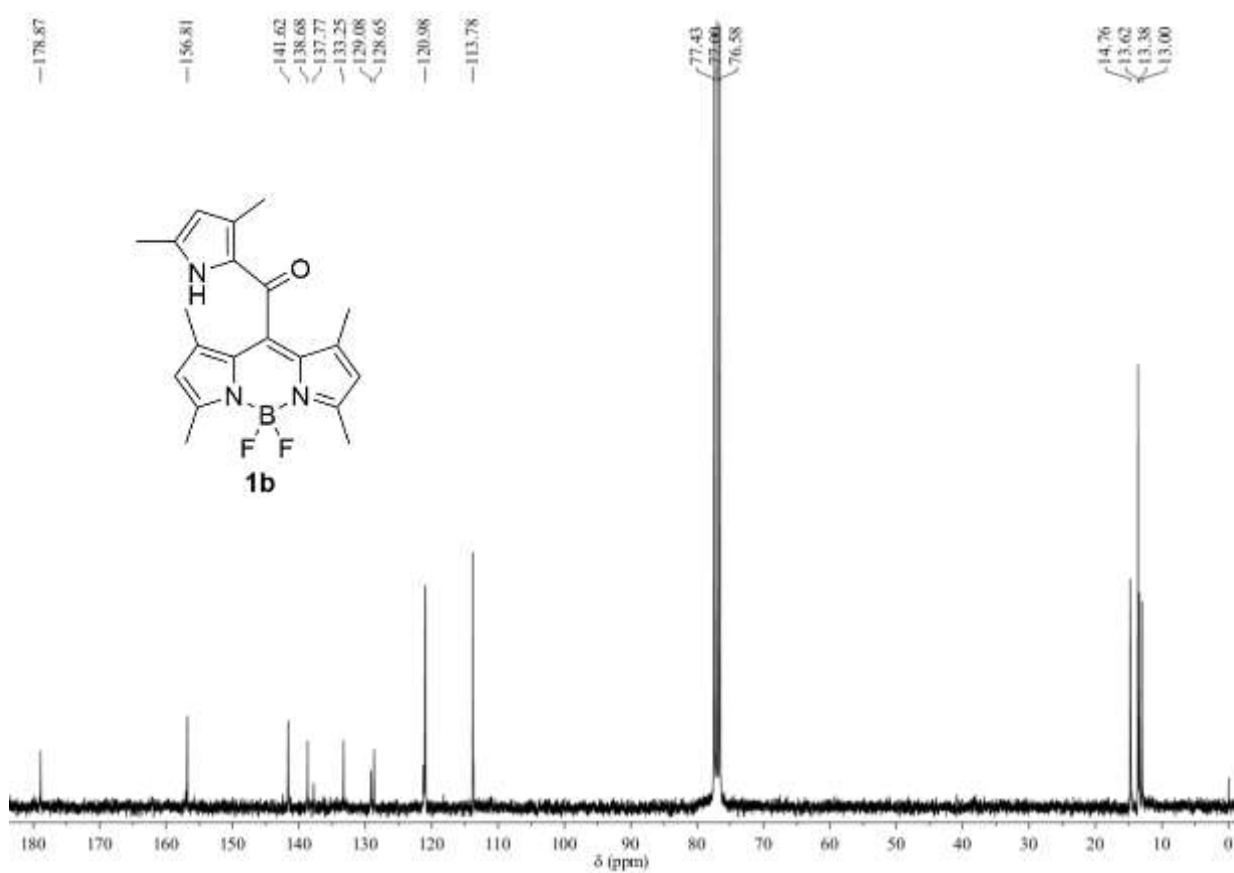

<sup>13</sup>C NMR spectrum of *meso*-2-ketopyrrolyl derived BODIPY **1b** in CDCl<sub>3</sub>

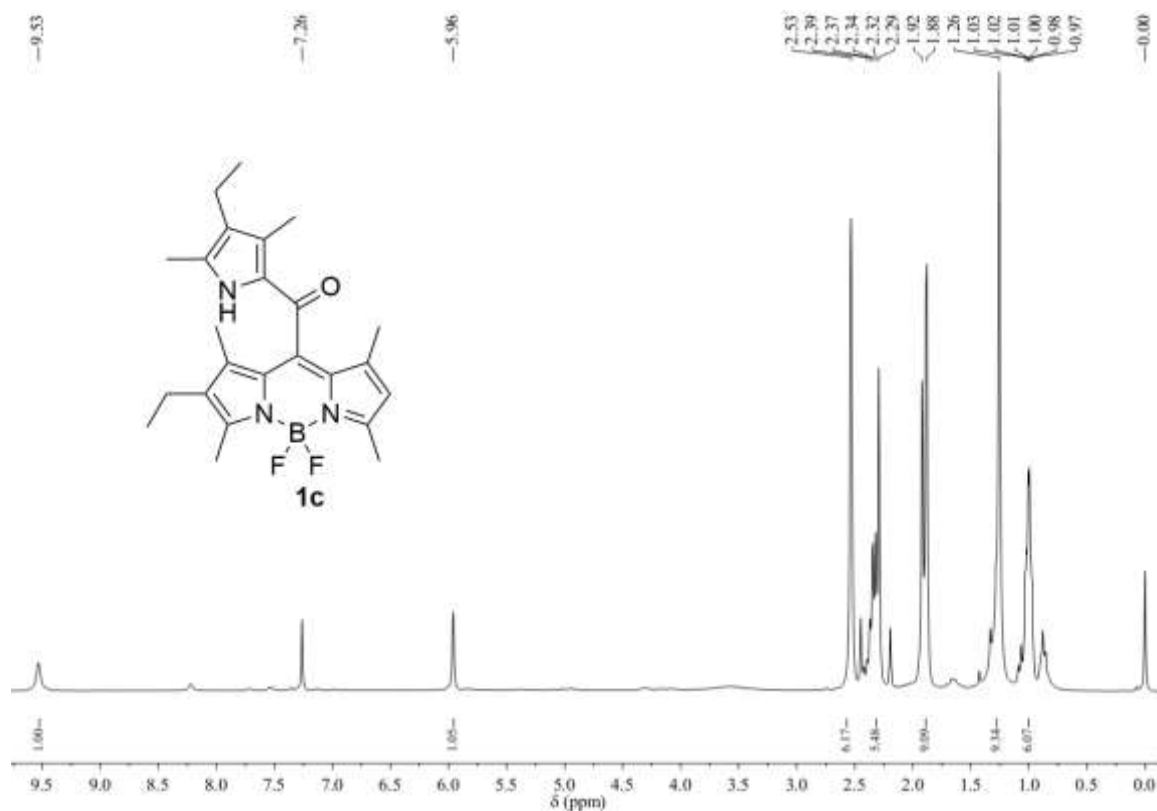

<sup>1</sup>H NMR spectrum of *meso*-2-ketopyrrolyl derived BODIPY **1c** in CDCl<sub>3</sub> solution

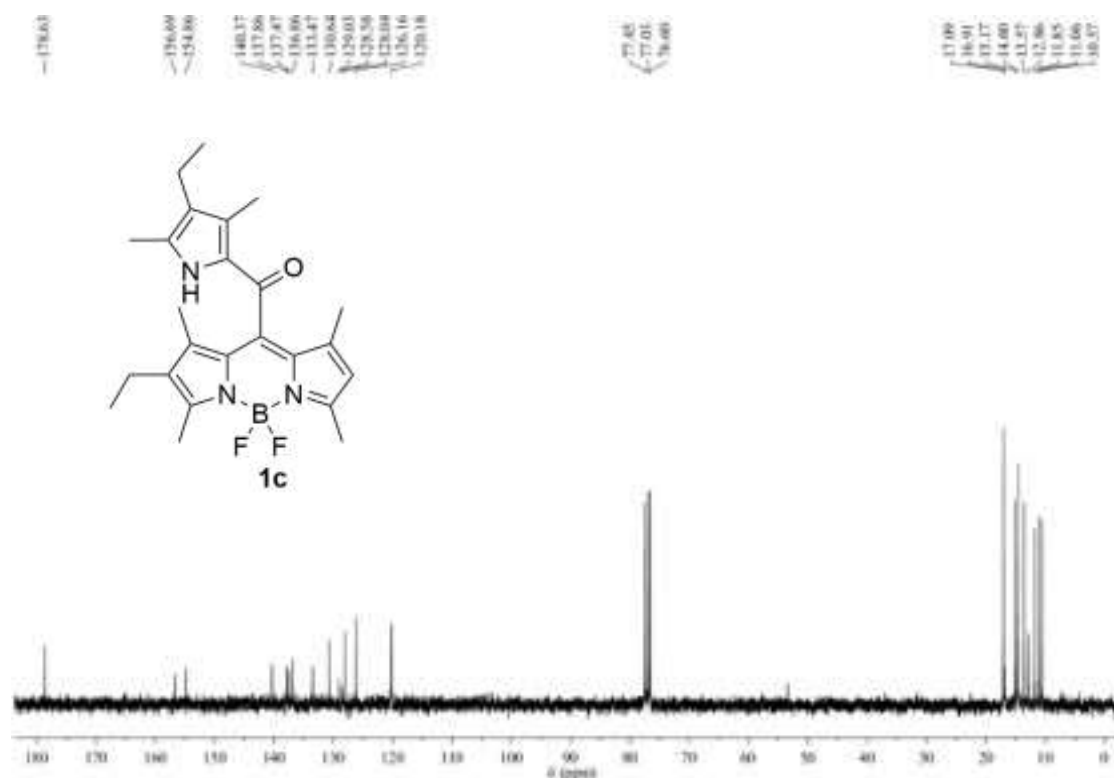

<sup>13</sup>C NMR spectrum of *meso*-2-ketopyrrolyl derived BODIPY **1c** in CDCl<sub>3</sub> solution

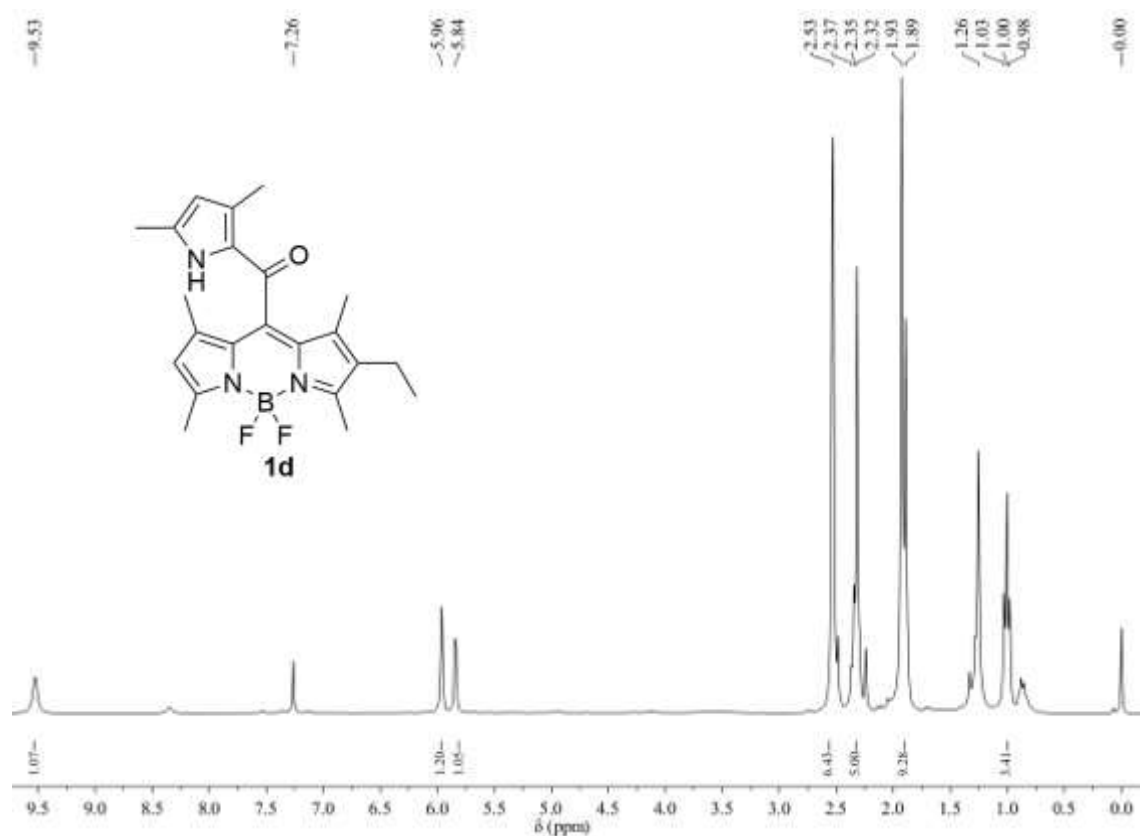

<sup>1</sup>H NMR spectrum of *meso*-2-ketopyrrolyl derived BODIPY **1d** in CDCl<sub>3</sub> solution

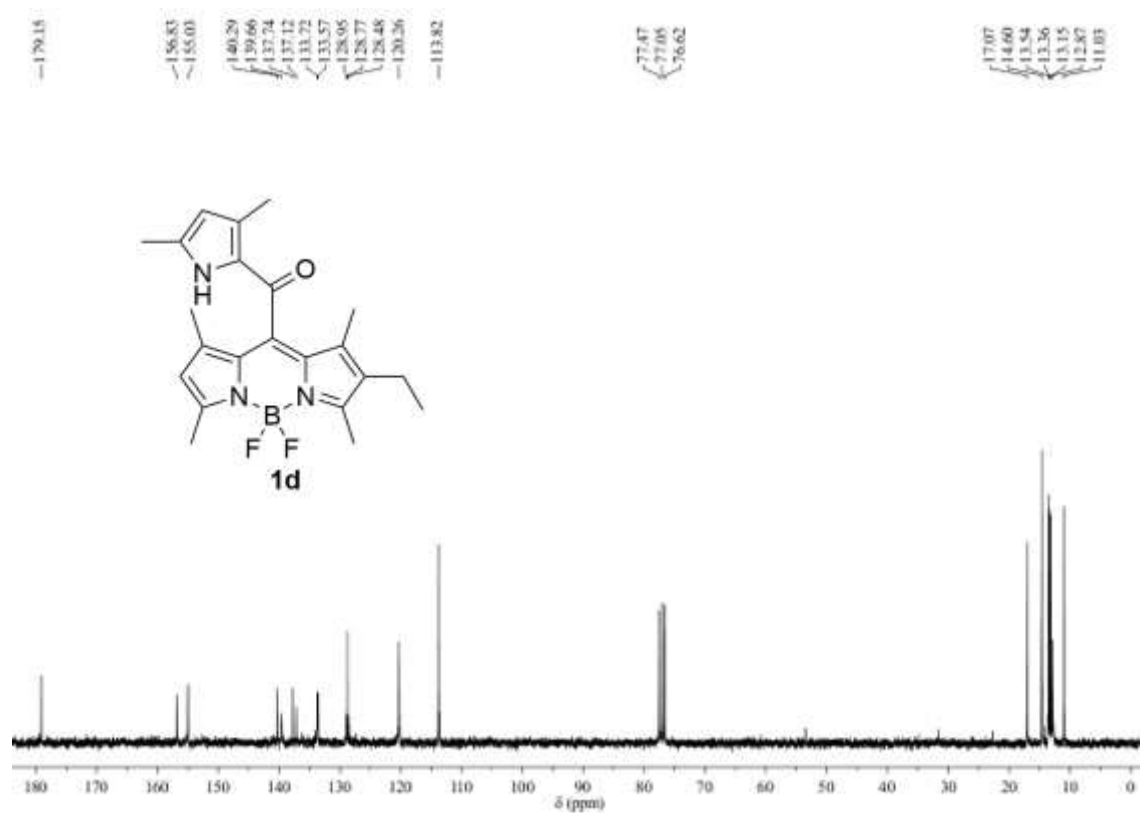

<sup>13</sup>C NMR spectrum of *meso*-2-ketopyrrolyl derived BODIPY **1d** in CDCl<sub>3</sub> solution



## 11. HRMS for *meso*-2-ketopyrrolyl derived BODIPYs

### HRMS of 1a

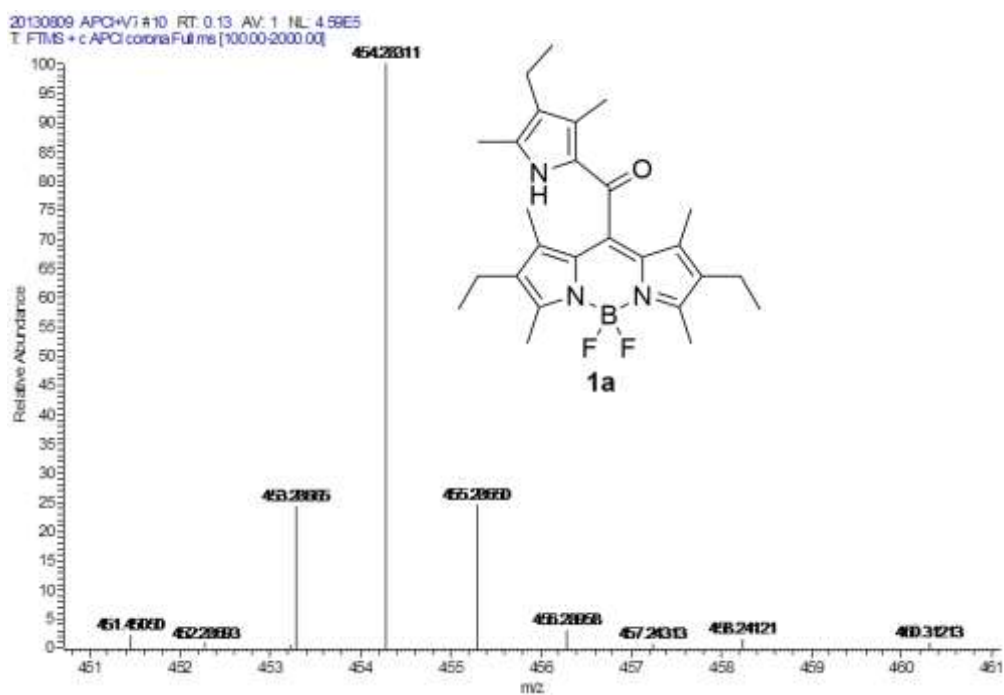

### HRMS of 1b

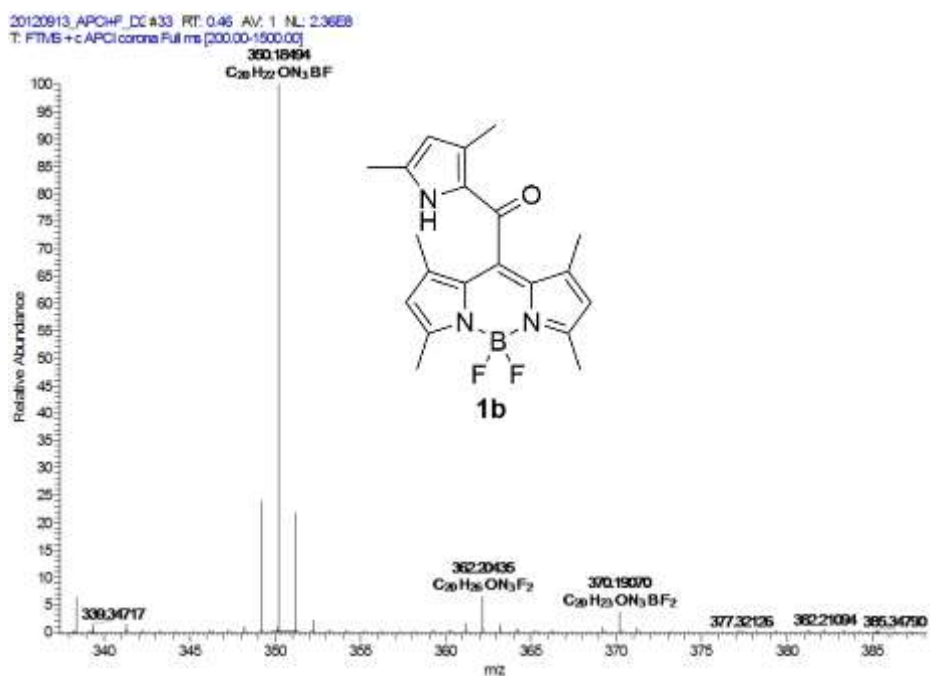

## HRMS of *meso*-2-ketopyrrolylBODIPY 1c

20130809\_APCI+VE #11 RT: 0.15 AV: 1 SB: 4 0.01-0.06 NL: 6.50E5  
T: FTMS +c APCI corona Full ms [100.00-2000.00]

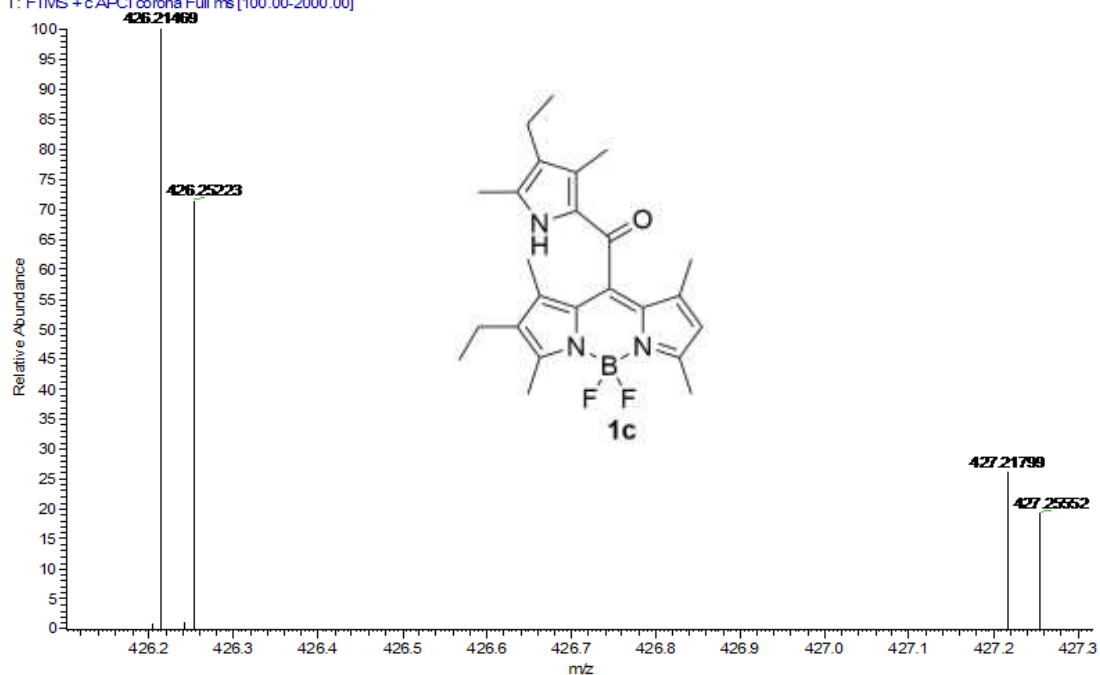

## HRMS of *meso*-2-ketopyrrolylBODIPY 1d

20130809\_APCI+VE #11 RT: 0.15 AV: 1 NL: 3.54E5  
T: FTMS +c APCI corona Full ms [100.00-2000.00]

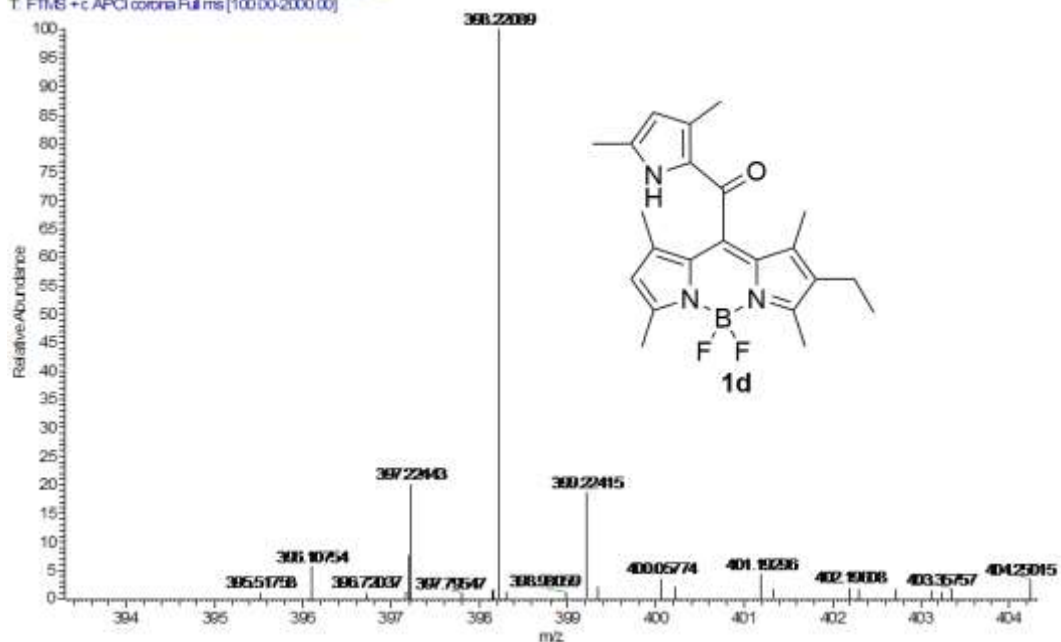

## 12. DFT computations

**Table S4.** Selected electronic excitation energies (eV) and oscillator strengths (f), configurations of the low-lying excited states of *meso*-2-ketopyrrolyl BODIPYs **1a** calculated by TDDFT//B3LYP/6-31+G(d,p), based on the optimized ground state geometries. The TDDFT calculations of all the molecules in dichloromethane were done by using the Self-Consistent Reaction Field method and the Polarizable Continuum Model.

| Electronic transition | TD//B3LYP/6-31+G(d, p) |                         |                 |        |
|-----------------------|------------------------|-------------------------|-----------------|--------|
|                       | Energy/ eV [a]<br>nm   | <i>f</i> <sup>[b]</sup> | Composition [c] | CI [d] |
| S0→S1                 | 2.6513 eV<br>467.63 nm | 0.2725                  | HOMO -1 → LUMO  | 0.4533 |
|                       |                        |                         | HOMO → LUMO     | 0.5334 |
| S0→S2                 | 2.7606 eV<br>449.12 nm | 0.3296                  | HOMO -1 → LUMO  | 0.5403 |
|                       |                        |                         | HOMO → LUMO     | 0.4408 |
| S0→S3                 | 3.2421 eV<br>382.42 nm | 0.1056                  | HOMO -2 → LUMO  | 0.6879 |
|                       |                        |                         | HOMO -1 → LUMO  | 0.1514 |

PCM-DFT optimized coordinates for *meso*-2-ketopyrrolyl BODIPY **1a**

|   |             |             |             |
|---|-------------|-------------|-------------|
| F | -2.97442500 | -0.05047800 | 2.04099400  |
| F | -4.22904900 | 0.20534100  | 0.13134100  |
| N | -2.23428600 | -1.17516400 | 0.02409900  |
| N | -2.07065300 | 1.30760100  | 0.24501900  |
| N | 2.06125800  | -0.20249200 | 0.98092200  |
| H | 1.16226200  | -0.15721300 | 1.43990700  |
| O | 1.28371000  | 0.05575600  | -2.54643500 |
| C | -0.80830300 | 1.25348100  | -0.35506900 |
| C | -0.96538300 | -1.18203100 | -0.56524500 |
| C | -0.25739200 | 0.01784800  | -0.72686800 |
| C | -2.70208400 | -2.44052900 | 0.04711100  |
| C | -2.37462800 | 2.59955900  | 0.48729200  |
| C | -0.65403000 | -2.53316000 | -0.92774900 |
| C | 2.24482900  | -0.14368700 | -0.39703200 |
| C | -0.32693800 | 2.59647700  | -0.49336200 |
| C | -1.31497900 | 3.43295300  | 0.03731400  |
| C | 3.25856500  | -0.32184500 | 1.61285000  |
| C | 1.14362900  | -0.02013200 | -1.32339800 |
| C | 4.26264300  | -0.34849500 | 0.63372900  |
| C | 3.62766800  | -0.23605400 | -0.63117300 |
| C | -1.75090600 | -3.31312900 | -0.54690500 |
| B | -2.92916100 | 0.07254000  | 0.63692300  |
| C | -4.03687600 | -2.78720000 | 0.62400800  |
| H | -4.14732800 | -2.36807900 | 1.62871300  |
| H | -4.16562100 | -3.86960800 | 0.67810600  |
| H | -4.84480400 | -2.36746400 | 0.01481200  |
| C | 3.35451800  | -0.37903400 | 3.10514000  |
| H | 3.51093200  | 0.61585200  | 3.54093100  |
| H | 4.19273000  | -1.00784100 | 3.41791600  |

|   |             |             |             |
|---|-------------|-------------|-------------|
| H | 2.44275300  | -0.79448900 | 3.54647100  |
| C | -3.65821100 | 3.00859600  | 1.13436600  |
| H | -4.50465500 | 2.82989500  | 0.46235100  |
| H | -3.63902300 | 4.06856300  | 1.39476300  |
| H | -3.84365900 | 2.42348100  | 2.03995700  |
| C | 0.57843400  | -3.02931400 | -1.62623700 |
| H | 0.70129900  | -2.55829700 | -2.60662000 |
| H | 0.52837300  | -4.11066000 | -1.77243800 |
| H | 1.48780600  | -2.81611800 | -1.05365500 |
| C | 0.95872300  | 3.04384700  | -1.12620800 |
| H | 1.83484600  | 2.62555300  | -0.61901900 |
| H | 1.04450400  | 4.13219900  | -1.09286700 |
| H | 1.01910500  | 2.73217200  | -2.17380000 |
| C | 5.74204100  | -0.44856800 | 0.89770900  |
| H | 5.91016900  | -0.98401000 | 1.84019900  |
| H | 6.21165900  | -1.06259900 | 0.11975200  |
| C | 4.29192100  | -0.22164900 | -1.97579700 |
| H | 3.78153200  | -0.88591700 | -2.67816300 |
| H | 5.34009900  | -0.52372100 | -1.90008400 |
| H | 4.26020700  | 0.77836200  | -2.42436000 |
| C | -1.30475800 | 4.93770400  | 0.09541600  |
| H | -1.81683300 | 5.27307500  | 1.00546900  |
| H | -0.27242400 | 5.29281400  | 0.19175600  |
| C | -1.95858000 | 5.61111200  | -1.12698600 |
| H | -3.00677400 | 5.31066500  | -1.22927800 |
| H | -1.44355800 | 5.33020700  | -2.05168300 |
| H | -1.92582200 | 6.70268600  | -1.03618200 |
| C | -1.91288800 | -4.80149300 | -0.71069300 |
| H | -2.97341700 | -5.04204700 | -0.84837300 |
| H | -1.41733900 | -5.12274000 | -1.63411600 |
| C | 6.45705300  | 0.91500800  | 0.96022400  |
| H | 6.04560200  | 1.53946900  | 1.76067100  |
| H | 6.33967000  | 1.46361100  | 0.01986100  |
| H | 7.52920400  | 0.78723400  | 1.14699400  |
| C | -1.35778500 | -5.62075200 | 0.47083000  |
| H | -1.49927400 | -6.69448900 | 0.30378700  |
| H | -1.85992700 | -5.35384300 | 1.40699900  |
| H | -0.28685100 | -5.43591400 | 0.60718000  |
